# Supplementary material for: Thermoelectricity in transition metal compounds: the role of spin disorder
Source: Royal Society of Chemistry journal article supplement (doi:10.1039/c6cp06943f), 2016-01-01
Supplement: c6cp06943f1.pdf [file c6cp06943f1.pdf]

**Electronic Supplementary Information**  
**“Thermoelectricity in Transition Metal Compounds:  
Role of Spin Disorder”**

Prashun Gorai,<sup>†,‡</sup> Eric S. Toberer,<sup>†,‡</sup> and Vladan Stevanović<sup>\*,†,‡</sup>

<sup>†</sup>*Colorado School of Mines, Golden, Colorado 80401, USA*

<sup>‡</sup>*National Renewable Energy Laboratory, Golden, Colorado 80401, USA*

E-mail: [vladan.stevanovic@nrel.gov](mailto:vladan.stevanovic@nrel.gov)

## Predicted Thermoelectric Performance of Transition-Metal Sulfides

Table S1: Material properties used to determine  $\beta_{SE}$  obtained from high-throughput DFT calculations. The parameters include: chemical formula, space group number (SG), Inorganic Crystal Structure Database (ICSD) identification number,  $\beta_{SE}$  for valence band (p-type) and conduction band (n-type) transport, lattice thermal conductivity ( $\kappa_L$ ) in  $\text{Wm}^{-1}\text{K}^{-1}$ , bulk modulus ( $B$ ) in GPa, valence band (VB) density of states (DOS) effective mass  $m_{DOS,VB}^*$  and conduction band (CB) DOS effective mass  $m_{DOS,CB}^*$  in the units of  $m_e$ , and VB degeneracy  $N_{b,VB}$  and CB degeneracy  $N_{b,CB}$ .

| Compound                           | SG  | ICSD   | $\beta_{SE}(p)$ | $\beta_{SE}(n)$ | $\kappa_L$ | $B$ | $m_{DOS,VB}^*$ | $m_{DOS,CB}^*$ | $N_{b,VB}$ | $N_{b,CB}$ |
|------------------------------------|-----|--------|-----------------|-----------------|------------|-----|----------------|----------------|------------|------------|
| AgAlS <sub>2</sub>                 | 122 | 604698 | 0.72            | 3.90            | 9.2        | 58  | 5.55           | 0.07           | 2.0        | 1.0        |
| AgAlS <sub>2</sub>                 | 122 | 028744 | 0.71            | 3.83            | 9.2        | 58  | 5.62           | 0.07           | 2.0        | 1.0        |
| AgAlS <sub>2</sub>                 | 122 | 604692 | 0.71            | 3.88            | 9.2        | 58  | 5.66           | 0.07           | 2.0        | 1.0        |
| AgAlS <sub>2</sub>                 | 156 | 025356 | 1.37            | 4.03            | 13.6       | 72  | 3.61           | 0.05           | 3.0        | 1.0        |
| AgAlS <sub>2</sub>                 | 122 | 604694 | 0.70            | 3.83            | 9.2        | 58  | 5.73           | 0.07           | 2.0        | 1.0        |
| AgBa <sub>2</sub> InS <sub>4</sub> | 14  | 183654 | 4.73            | 5.32            | 2.8        | 34  | 3.65           | 0.12           | 4.0        | 1.0        |
| AgCd <sub>2</sub> GaS <sub>4</sub> | 31  | 170108 | 2.41            | 8.26            | 6.1        | 53  | 1.24           | 0.03           | 2.0        | 1.0        |
| AgCd <sub>2</sub> GaS <sub>4</sub> | 31  | 090459 | 2.40            | 8.03            | 6.1        | 53  | 1.24           | 0.03           | 2.0        | 1.0        |
| AgCrS <sub>2</sub>                 | 160 | 024797 | 0.55            | 1.34            | 12.0       | 68  | 1.41           | 0.83           | 1.0        | 1.5        |
| AgCrS <sub>2</sub>                 | 160 | 042395 | 0.56            | 1.33            | 12.0       | 68  | 1.39           | 0.84           | 1.0        | 1.5        |
| AgCrS <sub>2</sub>                 | 160 | 604981 | 0.55            | 1.32            | 12.0       | 68  | 1.40           | 0.85           | 1.0        | 1.5        |
| AgCrS <sub>2</sub>                 | 160 | 042396 | 0.59            | 1.34            | 12.0       | 68  | 1.25           | 0.83           | 1.0        | 1.5        |
| AgCuS                              | 63  | 030233 | 4.14            | 1.45            | 2.9        | 29  | 0.67           | 0.76           | 2.0        | 1.0        |
| AgCuS                              | 26  | 066582 | 4.14            | 2.53            | 1.2        | 17  | 1.17           | 0.53           | 2.0        | 1.0        |
| AgCuS                              | 26  | 066581 | 10.44           | 2.52            | 1.3        | 18  | 1.25           | 0.53           | 4.0        | 1.0        |
| AgCuS                              | 36  | 066580 | 4.17            | 1.45            | 2.8        | 29  | 0.66           | 0.76           | 2.0        | 1.0        |
| AgFeS <sub>2</sub>                 | 122 | 056263 | 16.48           | 1.84            | 7.6        | 54  | 1.54           | 7.01           | 10.0       | 4.0        |
| AgFe <sub>2</sub> S <sub>3</sub>   | 64  | 068347 | 1.91            | 3.01            | 2.0        | 25  | 8.24           | 7.52           | 3.0        | 4.0        |
| AgFe <sub>2</sub> S <sub>3</sub>   | 14  | 165661 | 0.17            | 1.11            | 3.7        | 39  | 5.39           | 3.14           | 0.5        | 1.5        |
| AgGaS <sub>2</sub>                 | 122 | 023698 | 0.87            | 5.52            | 8.0        | 56  | 0.94           | 0.04           | 1.0        | 1.0        |
| AgGaS <sub>2</sub>                 | 122 | 605184 | 0.88            | 5.53            | 7.9        | 56  | 0.93           | 0.04           | 1.0        | 1.0        |
| AgGaS <sub>2</sub>                 | 122 | 605175 | 0.86            | 5.37            | 8.0        | 56  | 0.97           | 0.05           | 1.0        | 1.0        |
| AgGaS <sub>2</sub>                 | 122 | 605182 | 0.86            | 5.37            | 8.0        | 56  | 0.97           | 0.05           | 1.0        | 1.0        |
| AgGaS <sub>2</sub>                 | 122 | 605187 | 0.86            | 5.49            | 8.0        | 56  | 0.96           | 0.04           | 1.0        | 1.0        |
| AgGaS <sub>2</sub>                 | 122 | 605177 | 0.86            | 5.46            | 7.9        | 56  | 0.97           | 0.04           | 1.0        | 1.0        |

| Compound                           | SG  | ICSD   | $\beta_{SE}(p)$ | $\beta_{SE}(n)$ | $\kappa_L$ | $B$ | $m_{DOS,VB}^*$ | $m_{DOS,CB}^*$ | $N_{b,VB}$ | $N_{b,CB}$ |
|------------------------------------|-----|--------|-----------------|-----------------|------------|-----|----------------|----------------|------------|------------|
| AgGaS <sub>2</sub>                 | 122 | 605179 | 0.86            | 5.37            | 8.0        | 56  | 0.97           | 0.05           | 1.0        | 1.0        |
| AgGaS <sub>2</sub>                 | 122 | 600584 | 0.86            | 5.47            | 8.0        | 56  | 0.96           | 0.04           | 1.0        | 1.0        |
| AgGaS <sub>2</sub>                 | 122 | 028747 | 0.88            | 5.38            | 8.0        | 56  | 0.94           | 0.05           | 1.0        | 1.0        |
| AgGaS <sub>2</sub>                 | 9   | 092052 | 0.87            | 5.36            | 8.0        | 56  | 0.95           | 0.05           | 1.0        | 1.0        |
| AgGaS <sub>2</sub>                 | 122 | 605186 | 0.86            | 5.41            | 7.9        | 56  | 0.96           | 0.05           | 1.0        | 1.0        |
| AgGaS <sub>2</sub>                 | 122 | 042125 | 0.86            | 5.51            | 8.0        | 56  | 0.96           | 0.04           | 1.0        | 1.0        |
| AgGaS <sub>2</sub>                 | 122 | 156126 | 0.86            | 5.47            | 8.0        | 56  | 0.96           | 0.04           | 1.0        | 1.0        |
| AgGaS <sub>2</sub>                 | 122 | 603823 | 0.85            | 5.38            | 7.9        | 56  | 0.99           | 0.05           | 1.0        | 1.0        |
| AgGaS <sub>2</sub>                 | 122 | 605191 | 0.86            | 5.43            | 7.9        | 56  | 0.97           | 0.04           | 1.0        | 1.0        |
| AgGaS <sub>2</sub>                 | 122 | 156785 | 0.86            | 5.48            | 8.0        | 56  | 0.96           | 0.04           | 1.0        | 1.0        |
| AgGeLa <sub>3</sub> S <sub>7</sub> | 173 | 605297 | 4.20            | 2.08            | 5.2        | 52  | 3.15           | 2.01           | 4.0        | 2.0        |
| AgGeLa <sub>3</sub> S <sub>7</sub> | 173 | 080174 | 2.79            | 2.11            | 5.2        | 52  | 3.20           | 1.98           | 3.0        | 2.0        |
| AgInS <sub>2</sub>                 | 122 | 605407 | 0.95            | 6.53            | 6.5        | 48  | 0.89           | 0.04           | 1.0        | 1.0        |
| AgInS <sub>2</sub>                 | 33  | 605408 | 4.39            | 8.67            | 5.1        | 46  | 1.28           | 0.03           | 3.0        | 1.0        |
| AgInS <sub>2</sub>                 | 122 | 052577 | 0.95            | 6.60            | 6.5        | 48  | 0.89           | 0.04           | 1.0        | 1.0        |
| AgInS <sub>2</sub>                 | 122 | 156129 | 0.95            | 6.50            | 6.5        | 48  | 0.89           | 0.04           | 1.0        | 1.0        |
| AgInS <sub>2</sub>                 | 33  | 052578 | 4.49            | 8.66            | 5.1        | 47  | 1.24           | 0.03           | 3.0        | 1.0        |
| AgInS <sub>2</sub>                 | 122 | 605418 | 0.94            | 6.56            | 6.5        | 48  | 0.90           | 0.04           | 1.0        | 1.0        |
| AgInS <sub>2</sub>                 | 122 | 605415 | 0.95            | 6.50            | 6.5        | 48  | 0.88           | 0.04           | 1.0        | 1.0        |
| AgInS <sub>2</sub>                 | 122 | 656317 | 0.95            | 6.64            | 6.5        | 48  | 0.88           | 0.03           | 1.0        | 1.0        |
| AgInS <sub>2</sub>                 | 122 | 605413 | 0.95            | 6.61            | 6.5        | 48  | 0.88           | 0.03           | 1.0        | 1.0        |
| AgInS <sub>2</sub>                 | 122 | 051617 | 0.94            | 6.58            | 6.5        | 48  | 0.90           | 0.04           | 1.0        | 1.0        |
| AgInS <sub>2</sub>                 | 166 | 659385 | 0.96            | 8.17            | 9.4        | 60  | 3.48           | 0.25           | 2.0        | 3.0        |
| AgInS <sub>2</sub>                 | 33  | 605420 | 4.41            | 8.62            | 5.1        | 47  | 1.28           | 0.03           | 3.0        | 1.0        |
| AgInS <sub>2</sub>                 | 122 | 600585 | 0.96            | 6.61            | 6.5        | 48  | 0.86           | 0.03           | 1.0        | 1.0        |
| AgInS <sub>2</sub>                 | 166 | 032655 | 1.73            | 8.50            | 9.9        | 62  | 3.27           | 0.23           | 3.0        | 3.0        |
| AgInS <sub>2</sub>                 | 122 | 605417 | 0.94            | 6.47            | 6.5        | 48  | 0.90           | 0.04           | 1.0        | 1.0        |
| AgInS <sub>2</sub>                 | 122 | 028750 | 0.96            | 6.63            | 6.5        | 48  | 0.87           | 0.03           | 1.0        | 1.0        |
| AgInS <sub>2</sub>                 | 33  | 051618 | 4.42            | 8.57            | 5.1        | 47  | 1.27           | 0.03           | 3.0        | 1.0        |
| AgK <sub>2</sub> NbS <sub>4</sub>  | 70  | 084292 | 7.73            | 1.17            | 1.3        | 14  | 3.30           | 5.91           | 6.0        | 2.0        |
| AgK <sub>2</sub> S <sub>4</sub> V  | 70  | 066840 | 8.45            | 2.76            | 1.4        | 15  | 2.68           | 6.72           | 6.0        | 4.0        |

| Compound                                                      | SG  | ICSD   | $\beta_{SE}(p)$ | $\beta_{SE}(n)$ | $\kappa_L$ | $B$ | $m_{DOS,VB}^*$ | $m_{DOS,CB}^*$ | $N_{b,VB}$ | $N_{b,CB}$ |
|---------------------------------------------------------------|-----|--------|-----------------|-----------------|------------|-----|----------------|----------------|------------|------------|
| AgLa <sub>3</sub> S <sub>7</sub> Si                           | 173 | 409845 | 2.07            | 1.50            | 5.5        | 53  | 5.00           | 3.35           | 3.0        | 2.0        |
| AgLa <sub>3</sub> S <sub>7</sub> Si                           | 173 | 605505 | 2.06            | 1.49            | 5.5        | 53  | 5.04           | 3.36           | 3.0        | 2.0        |
| AgLa <sub>3</sub> S <sub>7</sub> Sn                           | 173 | 417316 | 4.30            | 1.82            | 4.7        | 49  | 3.24           | 2.69           | 4.0        | 2.0        |
| AgNa <sub>3</sub> S <sub>2</sub>                              | 72  | 201800 | 1.02            | 3.32            | 3.4        | 28  | 4.69           | 0.13           | 2.0        | 1.0        |
| AgNbRb <sub>2</sub> S <sub>4</sub>                            | 70  | 050463 | 10.66           | 1.25            | 1.1        | 13  | 4.32           | 6.07           | 8.0        | 2.0        |
| AgRb <sub>2</sub> S <sub>4</sub> V                            | 70  | 066841 | 11.78           | 2.71            | 1.2        | 14  | 3.46           | 7.94           | 8.0        | 4.0        |
| Ag <sub>2</sub> BaGeS <sub>4</sub>                            | 121 | 010040 | 7.19            | 4.69            | 5.2        | 41  | 0.45           | 0.07           | 3.0        | 1.0        |
| Ag <sub>2</sub> BaS <sub>2</sub>                              | 164 | 050183 | 3.12            | 4.69            | 6.6        | 47  | 1.50           | 0.06           | 3.0        | 1.0        |
| Ag <sub>2</sub> BaS <sub>4</sub> Sn                           | 23  | 041898 | 7.85            | 4.27            | 4.2        | 35  | 0.43           | 0.09           | 3.0        | 1.0        |
| Ag <sub>2</sub> CdGeS <sub>4</sub>                            | 31  | 152753 | 2.01            | 7.09            | 6.9        | 58  | 1.60           | 0.04           | 2.0        | 1.0        |
| Ag <sub>2</sub> CdGeS <sub>4</sub>                            | 33  | 423404 | 3.78            | 9.51            | 4.1        | 46  | 2.35           | 0.04           | 3.0        | 1.0        |
| Ag <sub>2</sub> FeS <sub>4</sub> Sn                           | 121 | 042534 | 0.96            | 13.13           | 6.8        | 49  | 0.86           | 0.03           | 1.0        | 1.5        |
| Ag <sub>2</sub> GeIn <sub>2</sub> S <sub>6</sub>              | 9   | 159759 | 1.11            | 6.98            | 2.4        | 28  | 1.49           | 0.07           | 1.0        | 1.0        |
| Ag <sub>2</sub> GeK <sub>2</sub> S <sub>4</sub>               | 15  | 170843 | 1.84            | 5.62            | 1.7        | 19  | 3.04           | 0.09           | 2.0        | 1.0        |
| Ag <sub>2</sub> GePbS <sub>4</sub>                            | 40  | 180802 | 16.22           | 3.48            | 2.1        | 26  | 1.26           | 1.27           | 6.0        | 2.0        |
| Ag <sub>2</sub> GeS <sub>3</sub>                              | 36  | 041711 | 1.93            | 5.99            | 5.3        | 45  | 1.77           | 0.05           | 2.0        | 1.0        |
| Ag <sub>2</sub> HfS <sub>3</sub>                              | 64  | 079251 | 2.08            | 2.67            | 5.2        | 60  | 0.50           | 1.65           | 1.0        | 2.0        |
| Ag <sub>2</sub> HgS <sub>2</sub>                              | 14  | 201713 | 1.44            | 9.03            | 3.8        | 41  | 0.87           | 0.04           | 1.0        | 1.0        |
| Ag <sub>2</sub> In <sub>2</sub> S <sub>6</sub> Si             | 9   | 159758 | 1.13            | 6.62            | 2.6        | 30  | 1.35           | 0.07           | 1.0        | 1.0        |
| Ag <sub>2</sub> S                                             | 19  | 262635 | 3.99            | 8.37            | 5.6        | 58  | 0.72           | 0.21           | 2.0        | 2.0        |
| Ag <sub>2</sub> S                                             | 4   | 098453 | 26.25           | 2.66            | 0.9        | 13  | 2.10           | 0.44           | 10.0       | 1.0        |
| Ag <sub>2</sub> S                                             | 4   | 098454 | 2.32            | 5.54            | 1.3        | 15  | 2.20           | 0.52           | 2.0        | 2.0        |
| Ag <sub>2</sub> S                                             | 19  | 262634 | 3.91            | 8.07            | 5.7        | 58  | 0.73           | 0.22           | 2.0        | 2.0        |
| Ag <sub>2</sub> S <sub>4</sub> SiZn                           | 7   | 183705 | 1.08            | 6.28            | 5.9        | 51  | 0.94           | 0.05           | 1.0        | 1.0        |
| Ag <sub>3</sub> AuS <sub>2</sub>                              | 213 | 015732 | 7.17            | 12.96           | 2.5        | 44  | 0.66           | 0.05           | 2.0        | 1.0        |
| Ag <sub>3</sub> CuS <sub>2</sub>                              | 141 | 067526 | 11.42           | 11.12           | 1.2        | 20  | 1.44           | 0.06           | 4.0        | 1.0        |
| Ag <sub>3</sub> CuS <sub>2</sub>                              | 141 | 163982 | 11.86           | 11.67           | 0.9        | 17  | 1.44           | 0.06           | 4.0        | 1.0        |
| Ag <sub>3</sub> CuS <sub>2</sub>                              | 88  | 163983 | 6.52            | 7.71            | 1.5        | 24  | 1.63           | 0.09           | 3.0        | 1.0        |
| Ag <sub>3</sub> K <sub>3</sub> Nb <sub>2</sub> S <sub>8</sub> | 15  | 412478 | 13.62           | 4.54            | 0.9        | 12  | 3.70           | 7.72           | 8.0        | 5.0        |
| Ag <sub>3</sub> NaS <sub>2</sub>                              | 227 | 073198 | 2.29            | 9.17            | 2.0        | 28  | 3.04           | 0.06           | 2.0        | 1.0        |
| Ag <sub>3</sub> RbS <sub>2</sub>                              | 12  | 001034 | 1.12            | 7.61            | 2.0        | 24  | 1.50           | 0.06           | 1.0        | 1.0        |

| Compound                                         | SG  | ICSD   | $\beta_{SE}(p)$ | $\beta_{SE}(n)$ | $\kappa_L$ | $B$ | $m_{DOS,VB}^*$ | $m_{DOS,CB}^*$ | $N_{b,VB}$ | $N_{b,CB}$ |
|--------------------------------------------------|-----|--------|-----------------|-----------------|------------|-----|----------------|----------------|------------|------------|
| Ag <sub>4</sub> CdGe <sub>2</sub> S <sub>7</sub> | 9   | 095121 | 5.12            | 8.63            | 3.9        | 44  | 2.69           | 0.04           | 4.0        | 1.0        |
| Ag <sub>4</sub> Ge <sub>2</sub> HgS <sub>7</sub> | 9   | 095120 | 5.38            | 9.43            | 3.6        | 43  | 2.71           | 0.04           | 4.0        | 1.0        |
| Ag <sub>4</sub> K <sub>2</sub> S <sub>3</sub>    | 12  | 000863 | 1.97            | 5.61            | 2.6        | 30  | 0.55           | 0.10           | 1.0        | 1.0        |
| Ag <sub>4</sub> Rb <sub>2</sub> S <sub>3</sub>   | 12  | 409727 | 1.91            | 5.91            | 2.2        | 27  | 0.65           | 0.10           | 1.0        | 1.0        |
| Ag <sub>5</sub> Ba <sub>2</sub> LaS <sub>6</sub> | 12  | 067894 | 0.80            | 3.88            | 4.8        | 46  | 1.85           | 0.13           | 1.0        | 1.0        |
| Ag <sub>6</sub> K <sub>2</sub> S <sub>4</sub>    | 227 | 073581 | 2.40            | 7.36            | 1.2        | 18  | 2.94           | 0.09           | 2.0        | 1.0        |
| Ag <sub>7</sub> NbS <sub>6</sub>                 | 7   | 084317 | 4.07            | 11.51           | 1.8        | 26  | 6.46           | 0.04           | 4.0        | 1.0        |
| Ag <sub>7</sub> NbS <sub>6</sub>                 | 7   | 084367 | 5.28            | 10.99           | 2.2        | 31  | 6.50           | 0.04           | 5.0        | 1.0        |
| Ag <sub>7</sub> RbS <sub>4</sub>                 | 85  | 071645 | 3.19            | 9.34            | 1.6        | 27  | 2.48           | 0.08           | 2.0        | 1.0        |
| AlCo <sub>7</sub> Y <sub>3</sub>                 | 173 | 606649 | 0.82            | 0.83            | 6.5        | 57  | 7.82           | 7.64           | 2.0        | 2.0        |
| AlCuS <sub>2</sub>                               | 122 | 042124 | 0.61            | 3.79            | 13.0       | 74  | 1.19           | 0.06           | 1.0        | 1.0        |
| AlCuS <sub>2</sub>                               | 122 | 165738 | 0.61            | 3.88            | 13.0       | 74  | 1.21           | 0.05           | 1.0        | 1.0        |
| AlCuS <sub>2</sub>                               | 122 | 607072 | 0.60            | 3.85            | 13.0       | 74  | 1.23           | 0.06           | 1.0        | 1.0        |
| AlCuS <sub>2</sub>                               | 122 | 603538 | 0.61            | 3.82            | 13.0       | 74  | 1.20           | 0.06           | 1.0        | 1.0        |
| AlCuS <sub>2</sub>                               | 122 | 607076 | 0.61            | 3.82            | 13.0       | 74  | 1.20           | 0.06           | 1.0        | 1.0        |
| AlCuS <sub>2</sub>                               | 122 | 028733 | 0.60            | 3.85            | 13.0       | 74  | 1.21           | 0.06           | 1.0        | 1.0        |
| AlCuS <sub>2</sub>                               | 122 | 607081 | 0.61            | 3.78            | 13.0       | 74  | 1.19           | 0.06           | 1.0        | 1.0        |
| AlCuS <sub>2</sub>                               | 122 | 607074 | 0.61            | 3.76            | 13.0       | 74  | 1.19           | 0.06           | 1.0        | 1.0        |
| AlFe <sub>7</sub> Y <sub>3</sub>                 | 173 | 607623 | 1.34            | 0.40            | 6.4        | 56  | 3.41           | 5.18           | 2.0        | 1.0        |
| AlLa <sub>3</sub> MnS <sub>7</sub>               | 173 | 608303 | 1.51            | 1.95            | 5.4        | 51  | 8.22           | 10.47          | 3.0        | 4.0        |
| AlMn <sub>7</sub> Y <sub>3</sub>                 | 173 | 608513 | 1.07            | 1.44            | 5.8        | 52  | 5.08           | 3.11           | 2.0        | 2.0        |
| AlMo <sub>4</sub> S <sub>8</sub>                 | 216 | 608603 | 0.13            | 0.09            | 10.7       | 79  | 5.08           | 9.40           | 0.5        | 0.5        |
| AlMo <sub>4</sub> S <sub>8</sub>                 | 216 | 036561 | 0.13            | 0.09            | 10.7       | 79  | 5.12           | 9.35           | 0.5        | 0.5        |
| AlMo <sub>4</sub> S <sub>8</sub>                 | 216 | 036562 | 0.13            | 0.09            | 10.7       | 79  | 5.09           | 9.32           | 0.5        | 0.5        |
| AlMo <sub>4</sub> S <sub>8</sub>                 | 160 | 036564 | 0.31            | 0.08            | 12.4       | 88  | 5.34           | 9.63           | 1.0        | 0.5        |
| AlNi <sub>7</sub> Y <sub>3</sub>                 | 173 | 608836 | 1.49            | 1.22            | 6.7        | 59  | 7.31           | 10.13          | 3.0        | 3.0        |
| Al <sub>2</sub> FeS <sub>4</sub>                 | 160 | 607619 | 1.51            | 3.93            | 0.6        | 6   | 3.65           | 1.92           | 2.0        | 3.0        |
| Al <sub>2</sub> MnS <sub>4</sub>                 | 227 | 608509 | 1.43            | 3.37            | 13.4       | 80  | 8.02           | 0.99           | 4.0        | 3.0        |
| AuCrS <sub>2</sub>                               | 160 | 088852 | 1.02            | 0.30            | 9.2        | 62  | 0.67           | 1.01           | 1.0        | 0.5        |
| BaCrS <sub>2</sub>                               | 59  | 165626 | 0.83            | 0.72            | 7.4        | 50  | 0.97           | 1.23           | 1.0        | 1.0        |
| BaCuLaS <sub>3</sub>                             | 62  | 078174 | 1.16            | 1.54            | 5.9        | 58  | 1.01           | 0.63           | 1.0        | 1.0        |

| Compound                                       | SG  | ICSD   | $\beta_{SE}(p)$ | $\beta_{SE}(n)$ | $\kappa_L$ | $B$ | $m_{DOS,VB}^*$ | $m_{DOS,CB}^*$ | $N_{b,VB}$ | $N_{b,CB}$ |
|------------------------------------------------|-----|--------|-----------------|-----------------|------------|-----|----------------|----------------|------------|------------|
| BaCuLaS <sub>3</sub>                           | 62  | 659175 | 1.19            | 1.56            | 5.9        | 58  | 0.98           | 0.62           | 1.0        | 1.0        |
| BaCuS <sub>3</sub> Sc                          | 63  | 659165 | 2.82            | 1.49            | 7.5        | 57  | 0.78           | 0.45           | 2.0        | 1.0        |
| BaCuS <sub>3</sub> Y                           | 63  | 659166 | 3.72            | 1.91            | 6.3        | 51  | 1.37           | 0.32           | 3.0        | 1.0        |
| BaCu <sub>2</sub> GeS <sub>4</sub>             | 144 | 010006 | 2.46            | 5.85            | 5.4        | 53  | 1.46           | 0.07           | 2.0        | 1.0        |
| BaCu <sub>2</sub> S <sub>2</sub>               | 139 | 203088 | 0.90            | 1.54            | 9.3        | 62  | 0.84           | 0.34           | 1.0        | 1.0        |
| BaCu <sub>2</sub> S <sub>2</sub>               | 139 | 615832 | 0.89            | 1.56            | 9.3        | 62  | 0.84           | 0.33           | 1.0        | 1.0        |
| BaCu <sub>2</sub> S <sub>2</sub>               | 139 | 615834 | 0.90            | 1.57            | 9.3        | 62  | 0.83           | 0.33           | 1.0        | 1.0        |
| BaCu <sub>2</sub> S <sub>2</sub>               | 139 | 615837 | 0.90            | 1.55            | 9.3        | 62  | 0.83           | 0.34           | 1.0        | 1.0        |
| BaCu <sub>2</sub> S <sub>2</sub>               | 62  | 089573 | 1.39            | 4.13            | 6.0        | 61  | 0.80           | 0.65           | 1.0        | 2.0        |
| BaCu <sub>2</sub> S <sub>2</sub>               | 62  | 066656 | 1.40            | 4.14            | 6.0        | 61  | 0.79           | 0.65           | 1.0        | 2.0        |
| BaCu <sub>2</sub> S <sub>2</sub>               | 139 | 089575 | 0.89            | 1.58            | 9.3        | 62  | 0.85           | 0.32           | 1.0        | 1.0        |
| BaCu <sub>2</sub> S <sub>4</sub> Sn            | 144 | 052685 | 2.55            | 7.10            | 4.9        | 49  | 1.44           | 0.05           | 2.0        | 1.0        |
| BaCu <sub>4</sub> S <sub>3</sub>               | 63  | 015139 | 2.19            | 4.06            | 5.4        | 54  | 0.37           | 0.13           | 1.0        | 1.0        |
| BaCu <sub>4</sub> S <sub>3</sub>               | 62  | 015138 | 7.13            | 4.06            | 2.9        | 39  | 0.43           | 0.22           | 2.0        | 1.0        |
| BaFe <sub>2</sub> S <sub>3</sub>               | 63  | 016307 | 0.94            | 1.29            | 3.0        | 29  | 7.15           | 10.75          | 2.0        | 3.0        |
| BaFe <sub>2</sub> S <sub>4</sub>               | 87  | 023081 | 2.48            | 0.91            | 2.6        | 23  | 6.04           | 1.27           | 4.0        | 1.0        |
| BaKNbS <sub>4</sub>                            | 62  | 415335 | 3.06            | 1.66            | 1.8        | 20  | 1.30           | 3.62           | 2.0        | 2.0        |
| BaK <sub>4</sub> S <sub>8</sub> V <sub>2</sub> | 72  | 240378 | 2.97            | 1.23            | 1.7        | 18  | 6.40           | 5.51           | 4.0        | 2.0        |
| BaLa <sub>2</sub> MnS <sub>5</sub>             | 140 | 091227 | 3.69            | 1.38            | 6.1        | 54  | 3.15           | 0.64           | 4.0        | 1.0        |
| BaLa <sub>2</sub> MnS <sub>5</sub>             | 82  | 090640 | 5.01            | 1.38            | 6.1        | 54  | 3.19           | 0.64           | 5.0        | 1.0        |
| BaLa <sub>2</sub> MnS <sub>5</sub>             | 140 | 090639 | 5.05            | 1.37            | 6.1        | 54  | 3.15           | 0.64           | 5.0        | 1.0        |
| BaMnS <sub>2</sub>                             | 62  | 031453 | 2.12            | 1.45            | 4.9        | 43  | 1.55           | 0.58           | 2.0        | 1.0        |
| BaMnS <sub>2</sub>                             | 62  | 615969 | 2.14            | 1.45            | 4.7        | 41  | 1.55           | 0.59           | 2.0        | 1.0        |
| BaMo <sub>6</sub> S <sub>8</sub>               | 148 | 062157 | 2.17            | 0.41            | 5.8        | 54  | 0.33           | 5.28           | 1.0        | 1.0        |
| BaMo <sub>6</sub> S <sub>8</sub>               | 2   | 065775 | 2.23            | 0.43            | 5.8        | 54  | 0.32           | 4.96           | 1.0        | 1.0        |
| BaMo <sub>6</sub> S <sub>8</sub>               | 2   | 085490 | 2.23            | 0.43            | 5.8        | 54  | 0.32           | 4.90           | 1.0        | 1.0        |
| BaMo <sub>6</sub> S <sub>8</sub>               | 148 | 065776 | 2.18            | 0.41            | 5.8        | 54  | 0.33           | 5.30           | 1.0        | 1.0        |
| BaMo <sub>6</sub> S <sub>8</sub>               | 2   | 615979 | 2.19            | 0.41            | 5.8        | 54  | 0.33           | 5.27           | 1.0        | 1.0        |
| BaMo <sub>6</sub> S <sub>8</sub>               | 148 | 615980 | 2.23            | 0.40            | 5.8        | 54  | 0.32           | 5.51           | 1.0        | 1.0        |
| BaMo <sub>6</sub> S <sub>8</sub>               | 148 | 085489 | 2.18            | 0.41            | 5.8        | 54  | 0.33           | 5.30           | 1.0        | 1.0        |
| BaMo <sub>6</sub> S <sub>8</sub>               | 148 | 615975 | 2.18            | 0.41            | 5.8        | 54  | 0.33           | 5.29           | 1.0        | 1.0        |

| Compound                                         | SG  | ICSD   | $\beta_{SE}(p)$ | $\beta_{SE}(n)$ | $\kappa_L$ | $B$ | $m_{DOS,VB}^*$ | $m_{DOS,CB}^*$ | $N_{b,VB}$ | $N_{b,CB}$ |
|--------------------------------------------------|-----|--------|-----------------|-----------------|------------|-----|----------------|----------------|------------|------------|
| BaPdS <sub>2</sub>                               | 63  | 202009 | 0.98            | 1.75            | 4.5        | 37  | 5.17           | 0.39           | 2.0        | 1.0        |
| BaPdS <sub>2</sub>                               | 63  | 063588 | 0.98            | 1.75            | 4.5        | 37  | 5.17           | 0.39           | 2.0        | 1.0        |
| BaPd <sub>2</sub> S <sub>4</sub>                 | 11  | 079930 | 3.20            | 1.35            | 4.5        | 43  | 4.61           | 0.77           | 4.0        | 1.0        |
| BaPt <sub>2</sub> S <sub>3</sub>                 | 92  | 201146 | 1.30            | 3.18            | 5.4        | 62  | 1.09           | 3.20           | 1.0        | 3.0        |
| BaS <sub>3</sub> V                               | 194 | 008194 | 4.21            | 0.98            | 6.0        | 46  | 3.45           | 12.01          | 5.0        | 3.0        |
| BaS <sub>3</sub> V                               | 36  | 616099 | 4.58            | 1.05            | 5.3        | 42  | 3.18           | 11.26          | 5.0        | 3.0        |
| BaS <sub>3</sub> V                               | 8   | 154184 | 2.43            | 0.17            | 2.4        | 26  | 3.10           | 6.32           | 2.5        | 0.5        |
| BaS <sub>3</sub> V                               | 194 | 008193 | 4.19            | 0.97            | 6.0        | 46  | 3.48           | 12.09          | 5.0        | 3.0        |
| BaS <sub>3</sub> V                               | 8   | 154183 | 1.70            | 2.64            | 4.3        | 42  | 2.72           | 11.15          | 2.0        | 5.0        |
| BaS <sub>3</sub> V                               | 194 | 015537 | 4.17            | 0.98            | 6.0        | 46  | 3.52           | 11.96          | 5.0        | 3.0        |
| BaS <sub>3</sub> V                               | 194 | 616098 | 4.17            | 0.98            | 6.0        | 46  | 3.51           | 12.02          | 5.0        | 3.0        |
| BaS <sub>3</sub> V                               | 36  | 052692 | 4.41            | 1.03            | 5.3        | 42  | 3.40           | 11.65          | 5.0        | 3.0        |
| BaS <sub>3</sub> V                               | 194 | 023194 | 4.19            | 0.98            | 6.0        | 46  | 3.49           | 11.96          | 5.0        | 3.0        |
| BaS <sub>3</sub> V                               | 36  | 063229 | 4.40            | 1.03            | 5.4        | 43  | 3.37           | 11.61          | 5.0        | 3.0        |
| BaS <sub>3</sub> V                               | 194 | 062711 | 4.17            | 0.98            | 6.0        | 46  | 3.51           | 12.02          | 5.0        | 3.0        |
| BaS <sub>3</sub> V                               | 36  | 154182 | 2.42            | 0.41            | 1.1        | 13  | 0.41           | 1.58           | 1.0        | 0.5        |
| Ba <sub>2</sub> CoS <sub>3</sub>                 | 62  | 160294 | 0.64            | 1.36            | 4.3        | 43  | 2.91           | 4.15           | 1.0        | 2.0        |
| Ba <sub>2</sub> Cu <sub>3</sub> S <sub>6</sub> V | 15  | 083969 | 10.17           | 1.18            | 2.7        | 31  | 3.49           | 6.79           | 7.0        | 2.0        |
| Ba <sub>2</sub> MnS <sub>3</sub>                 | 62  | 026231 | 1.19            | 2.33            | 4.1        | 41  | 5.14           | 0.33           | 2.0        | 1.0        |
| Ba <sub>3</sub> FeS <sub>5</sub>                 | 62  | 000280 | 2.35            | 2.40            | 3.3        | 38  | 5.37           | 5.15           | 3.0        | 3.0        |
| Ba <sub>6</sub> Fe <sub>8</sub> S <sub>15</sub>  | 87  | 016309 | 0.41            | 1.06            | 3.3        | 37  | 7.31           | 7.48           | 1.0        | 2.0        |
| CaMo <sub>6</sub> S <sub>8</sub>                 | 2   | 619422 | 2.81            | 1.23            | 2.4        | 28  | 0.32           | 3.26           | 1.0        | 1.5        |
| CaMo <sub>6</sub> S <sub>8</sub>                 | 148 | 062388 | 2.54            | 1.13            | 3.3        | 36  | 0.33           | 3.26           | 1.0        | 1.5        |
| CaMo <sub>6</sub> S <sub>8</sub>                 | 148 | 619421 | 2.30            | 1.08            | 4.3        | 43  | 0.35           | 3.16           | 1.0        | 1.5        |
| CdCr <sub>2</sub> S <sub>4</sub>                 | 227 | 657592 | 0.76            | 0.28            | 10.9       | 77  | 3.05           | 1.27           | 1.5        | 0.5        |
| CdCr <sub>2</sub> S <sub>4</sub>                 | 227 | 619688 | 0.76            | 0.28            | 10.9       | 77  | 3.05           | 1.27           | 1.5        | 0.5        |
| CdCr <sub>2</sub> S <sub>4</sub>                 | 227 | 619693 | 0.77            | 0.28            | 10.9       | 77  | 3.04           | 1.27           | 1.5        | 0.5        |
| CdCr <sub>2</sub> S <sub>4</sub>                 | 227 | 619692 | 0.77            | 0.28            | 10.9       | 77  | 3.04           | 1.27           | 1.5        | 0.5        |
| CdCr <sub>2</sub> S <sub>4</sub>                 | 227 | 619689 | 0.76            | 0.28            | 10.9       | 77  | 3.05           | 1.27           | 1.5        | 0.5        |
| CdCr <sub>2</sub> S <sub>4</sub>                 | 227 | 042021 | 0.76            | 0.28            | 10.9       | 77  | 3.05           | 1.27           | 1.5        | 0.5        |
| CdCr <sub>2</sub> S <sub>4</sub>                 | 227 | 619695 | 0.76            | 0.28            | 10.9       | 77  | 3.04           | 1.27           | 1.5        | 0.5        |

| Compound                            | SG  | ICSD   | $\beta_{SE}(p)$ | $\beta_{SE}(n)$ | $\kappa_L$ | $B$ | $m_{DOS,VB}^*$ | $m_{DOS,CB}^*$ | $N_{b,VB}$ | $N_{b,CB}$ |
|-------------------------------------|-----|--------|-----------------|-----------------|------------|-----|----------------|----------------|------------|------------|
| CdCr <sub>2</sub> S <sub>4</sub>    | 227 | 619686 | 0.76            | 0.28            | 10.9       | 77  | 3.05           | 1.27           | 1.5        | 0.5        |
| CdCr <sub>2</sub> S <sub>4</sub>    | 227 | 039415 | 0.77            | 0.28            | 10.9       | 77  | 3.04           | 1.27           | 1.5        | 0.5        |
| CdCr <sub>2</sub> S <sub>4</sub>    | 227 | 657591 | 0.77            | 0.28            | 10.9       | 77  | 3.04           | 1.27           | 1.5        | 0.5        |
| CdCr <sub>2</sub> S <sub>4</sub>    | 227 | 657590 | 0.77            | 0.28            | 10.9       | 77  | 3.04           | 1.27           | 1.5        | 0.5        |
| CdCr <sub>2</sub> S <sub>4</sub>    | 227 | 619697 | 0.76            | 0.28            | 10.9       | 77  | 3.05           | 1.27           | 1.5        | 0.5        |
| CdCu <sub>2</sub> GeS <sub>4</sub>  | 31  | 026150 | 2.62            | 7.46            | 7.5        | 63  | 1.02           | 0.04           | 2.0        | 1.0        |
| CdCu <sub>2</sub> S <sub>4</sub> Si | 31  | 016924 | 0.83            | 5.54            | 8.2        | 66  | 1.27           | 0.05           | 1.0        | 1.0        |
| CdCu <sub>2</sub> S <sub>4</sub> Si | 31  | 002780 | 0.83            | 5.65            | 8.2        | 66  | 1.27           | 0.05           | 1.0        | 1.0        |
| CdCu <sub>2</sub> S <sub>4</sub> Sn | 121 | 619774 | 2.73            | 7.02            | 8.6        | 60  | 1.81           | 0.03           | 3.0        | 1.0        |
| CdCu <sub>2</sub> S <sub>4</sub> Sn | 121 | 619773 | 2.73            | 7.11            | 8.6        | 60  | 1.80           | 0.03           | 3.0        | 1.0        |
| CdMo <sub>6</sub> S <sub>8</sub>    | 148 | 620169 | 3.02            | 1.45            | 5.1        | 50  | 1.05           | 0.71           | 2.0        | 1.0        |
| CoCr <sub>2</sub> S <sub>4</sub>    | 227 | 043039 | 1.53            | 0.10            | 11.4       | 79  | 0.93           | 6.95           | 1.5        | 0.5        |
| CoCr <sub>2</sub> S <sub>4</sub>    | 227 | 622503 | 1.53            | 0.10            | 11.3       | 78  | 0.94           | 6.86           | 1.5        | 0.5        |
| CoCr <sub>2</sub> S <sub>4</sub>    | 227 | 622504 | 1.53            | 0.10            | 11.3       | 78  | 0.93           | 7.05           | 1.5        | 0.5        |
| CoCr <sub>2</sub> S <sub>4</sub>    | 227 | 169878 | 1.53            | 0.10            | 11.3       | 78  | 0.93           | 7.00           | 1.5        | 0.5        |
| CoCr <sub>2</sub> S <sub>4</sub>    | 227 | 603918 | 1.52            | 0.10            | 11.3       | 78  | 0.94           | 6.96           | 1.5        | 0.5        |
| CoCr <sub>2</sub> S <sub>4</sub>    | 227 | 622497 | 1.52            | 0.10            | 11.3       | 78  | 0.94           | 6.88           | 1.5        | 0.5        |
| CoCr <sub>2</sub> S <sub>4</sub>    | 227 | 622501 | 1.53            | 0.10            | 11.3       | 78  | 0.93           | 6.91           | 1.5        | 0.5        |
| CoCr <sub>2</sub> S <sub>4</sub>    | 227 | 052942 | 1.52            | 0.10            | 11.3       | 78  | 0.94           | 6.89           | 1.5        | 0.5        |
| CoCu <sub>2</sub> GeS <sub>4</sub>  | 121 | 099293 | 2.27            | 0.32            | 10.8       | 70  | 0.85           | 0.86           | 2.0        | 0.5        |
| CoCu <sub>2</sub> S <sub>4</sub> Si | 121 | 622576 | 3.33            | 0.11            | 12.0       | 74  | 1.05           | 4.42           | 3.0        | 0.5        |
| CoCu <sub>2</sub> S <sub>4</sub> Si | 121 | 099292 | 3.30            | 0.11            | 12.0       | 74  | 1.06           | 4.51           | 3.0        | 0.5        |
| CoCu <sub>2</sub> S <sub>4</sub> Sn | 121 | 099294 | 1.53            | 1.41            | 9.5        | 64  | 0.89           | 1.03           | 1.5        | 1.5        |
| CoCu <sub>2</sub> S <sub>4</sub> Sn | 121 | 622578 | 1.52            | 1.42            | 9.6        | 65  | 0.90           | 1.02           | 1.5        | 1.5        |
| CoGa <sub>2</sub> S <sub>4</sub>    | 82  | 052961 | 1.09            | 0.08            | 6.2        | 42  | 1.61           | 9.17           | 1.5        | 0.5        |
| CoK <sub>2</sub> S <sub>2</sub>     | 72  | 623958 | 2.05            | 0.77            | 3.4        | 25  | 6.32           | 16.47          | 4.0        | 3.0        |
| CoK <sub>6</sub> S <sub>4</sub>     | 186 | 068603 | 2.14            | 1.41            | 2.6        | 22  | 12.87          | 0.60           | 5.0        | 1.0        |
| CoMo <sub>2</sub> S <sub>4</sub>    | 9   | 002018 | 0.95            | 1.34            | 7.1        | 74  | 1.58           | 4.51           | 1.0        | 2.0        |
| CoMo <sub>2</sub> S <sub>4</sub>    | 9   | 624227 | 0.57            | 0.62            | 15.8       | 127 | 2.42           | 2.07           | 1.0        | 1.0        |
| CoMo <sub>2</sub> S <sub>4</sub>    | 9   | 094752 | 1.13            | 1.53            | 7.4        | 77  | 1.17           | 3.54           | 1.0        | 2.0        |
| CoNa <sub>2</sub> S <sub>2</sub>    | 72  | 067386 | 7.65            | 0.79            | 4.5        | 33  | 3.44           | 15.38          | 8.0        | 3.0        |



| Compound                                       | SG  | ICSD   | $\beta_{SE}(p)$ | $\beta_{SE}(n)$ | $\kappa_L$ | $B$  | $m_{DOS,VB}^*$ | $m_{DOS,CB}^*$ | $N_{b,VB}$ | $N_{b,CB}$ |
|------------------------------------------------|-----|--------|-----------------|-----------------|------------|------|----------------|----------------|------------|------------|
| CoNa <sub>6</sub> S <sub>4</sub>               | 186 | 037012 | 1.57            | 0.27            | 3.7        | 31   | 11.91          | 9.11           | 4.0        | 1.0        |
| CoRb <sub>2</sub> S <sub>2</sub>               | 72  | 067388 | 1.62            | 0.59            | 2.5        | 22   | 12.41          | 13.40          | 4.0        | 2.0        |
| CoRh <sub>2</sub> S <sub>4</sub>               | 227 | 174043 | 0.36            | 4.11            | 504.5      | 1164 | 3.19           | 1.88           | 2.0        | 9.0        |
| Co <sub>2</sub> Ge <sub>3</sub> S <sub>3</sub> | 146 | 404663 | 5.00            | 2.77            | 11.8       | 112  | 0.08           | 5.75           | 1.0        | 4.0        |
| Co <sub>2</sub> Ge <sub>3</sub> S <sub>3</sub> | 146 | 655009 | 5.04            | 2.77            | 11.8       | 112  | 0.08           | 5.75           | 1.0        | 4.0        |
| Co <sub>2</sub> Na <sub>5</sub> S <sub>5</sub> | 107 | 201439 | 2.15            | 0.15            | 17.5       | 87   | 5.02           | 1.89           | 5.0        | 0.5        |
| Co <sub>3</sub> Rb <sub>2</sub> S <sub>4</sub> | 72  | 624797 | 6.12            | 1.31            | 2.7        | 28   | 2.97           | 4.58           | 5.0        | 2.0        |
| Co <sub>3</sub> S <sub>4</sub>                 | 227 | 056125 | 1.14            | 1.89            | 12.8       | 94   | 8.49           | 3.66           | 3.0        | 3.0        |
| Co <sub>3</sub> S <sub>4</sub>                 | 227 | 624840 | 1.13            | 1.88            | 12.8       | 94   | 8.58           | 3.70           | 3.0        | 3.0        |
| Co <sub>8</sub> NiS <sub>8</sub>               | 225 | 624466 | 3.87            | 2.83            | 2.5        | 29   | 2.33           | 1.53           | 3.0        | 2.0        |
| Co <sub>9</sub> S <sub>8</sub>                 | 225 | 657415 | 2.39            | 0.19            | 4.2        | 42   | 2.72           | 4.34           | 2.5        | 0.5        |
| Co <sub>9</sub> S <sub>8</sub>                 | 225 | 660368 | 2.38            | 0.20            | 4.2        | 42   | 2.75           | 4.03           | 2.5        | 0.5        |
| Co <sub>9</sub> S <sub>8</sub>                 | 225 | 600664 | 2.39            | 0.19            | 4.2        | 42   | 2.72           | 4.17           | 2.5        | 0.5        |
| Co <sub>9</sub> S <sub>8</sub>                 | 225 | 624834 | 3.00            | 0.20            | 4.2        | 42   | 2.86           | 4.01           | 3.0        | 0.5        |
| Co <sub>9</sub> S <sub>8</sub>                 | 225 | 031753 | 1.15            | 0.21            | 4.2        | 42   | 2.82           | 3.80           | 1.5        | 0.5        |
| Co <sub>9</sub> S <sub>8</sub>                 | 225 | 023929 | 2.96            | 0.20            | 4.2        | 42   | 2.91           | 3.97           | 3.0        | 0.5        |
| Co <sub>9</sub> S <sub>8</sub>                 | 225 | 040046 | 3.03            | 0.20            | 4.2        | 42   | 2.81           | 4.07           | 3.0        | 0.5        |
| CrKS <sub>2</sub>                              | 166 | 042406 | 0.35            | 1.10            | 10.7       | 53   | 2.36           | 0.91           | 1.0        | 1.5        |
| CrKS <sub>2</sub>                              | 166 | 042407 | 0.36            | 1.11            | 10.8       | 53   | 2.22           | 0.89           | 1.0        | 1.5        |
| CrKS <sub>2</sub>                              | 166 | 025723 | 0.36            | 1.10            | 10.7       | 53   | 2.27           | 0.90           | 1.0        | 1.5        |
| CrLaS <sub>3</sub>                             | 62  | 051123 | 1.93            | 10.53           | 9.6        | 79   | 0.33           | 0.83           | 1.0        | 5.0        |
| CrMo <sub>2</sub> S <sub>4</sub>               | 9   | 094748 | 3.81            | 1.84            | 10.9       | 103  | 5.62           | 0.44           | 5.0        | 1.0        |
| CrMo <sub>2</sub> S <sub>4</sub>               | 9   | 626322 | 1.18            | 1.45            | 6.6        | 68   | 1.09           | 0.78           | 1.0        | 1.0        |
| CrNaS <sub>2</sub>                             | 166 | 042390 | 0.34            | 1.12            | 11.2       | 56   | 2.58           | 0.91           | 1.0        | 1.5        |
| CrNaS <sub>2</sub>                             | 166 | 660322 | 0.34            | 1.12            | 11.1       | 56   | 2.64           | 0.91           | 1.0        | 1.5        |
| CrNaS <sub>2</sub>                             | 166 | 025722 | 0.34            | 1.14            | 11.2       | 56   | 2.58           | 0.88           | 1.0        | 1.5        |
| CrNaS <sub>2</sub>                             | 166 | 015558 | 0.35            | 1.30            | 11.2       | 56   | 2.45           | 0.71           | 1.0        | 1.5        |
| CrNaS <sub>2</sub>                             | 166 | 626368 | 0.34            | 1.11            | 11.1       | 56   | 2.61           | 0.93           | 1.0        | 1.5        |
| CrNaS <sub>2</sub>                             | 166 | 042389 | 0.34            | 1.09            | 11.1       | 56   | 2.62           | 0.95           | 1.0        | 1.5        |
| CrS                                            | 194 | 626593 | 3.47            | 3.18            | 7.9        | 48   | 1.87           | 3.66           | 4.0        | 5.0        |
| CrS                                            | 194 | 049666 | 2.47            | 3.28            | 7.9        | 48   | 1.69           | 3.49           | 3.0        | 5.0        |

| Compound                          | SG  | ICSD   | $\beta_{SE}(p)$ | $\beta_{SE}(n)$ | $\kappa_L$ | $B$ | $m_{DOS,VB}^*$ | $m_{DOS,CB}^*$ | $N_{b,VB}$ | $N_{b,CB}$ |
|-----------------------------------|-----|--------|-----------------|-----------------|------------|-----|----------------|----------------|------------|------------|
| CrS                               | 194 | 626613 | 3.92            | 3.43            | 7.8        | 48  | 1.55           | 3.26           | 4.0        | 5.0        |
| CrS                               | 194 | 626595 | 3.34            | 3.28            | 7.9        | 48  | 1.46           | 3.45           | 3.5        | 5.0        |
| CrS                               | 15  | 016723 | 3.13            | 3.04            | 8.0        | 48  | 2.18           | 3.85           | 4.0        | 5.0        |
| Cr <sub>2</sub> FeS <sub>4</sub>  | 227 | 625937 | 0.25            | 0.32            | 11.5       | 89  | 9.27           | 5.87           | 1.0        | 1.0        |
| Cr <sub>2</sub> FeS <sub>4</sub>  | 227 | 043268 | 0.25            | 0.33            | 11.5       | 89  | 9.24           | 5.78           | 1.0        | 1.0        |
| Cr <sub>2</sub> FeS <sub>4</sub>  | 227 | 625938 | 0.59            | 0.91            | 14.8       | 105 | 1.87           | 11.69          | 1.0        | 3.0        |
| Cr <sub>2</sub> FeS <sub>4</sub>  | 227 | 658964 | 2.66            | 0.41            | 11.9       | 80  | 2.54           | 0.61           | 3.5        | 0.5        |
| Cr <sub>2</sub> FeS <sub>4</sub>  | 227 | 095399 | 0.24            | 0.32            | 11.5       | 89  | 9.28           | 5.94           | 1.0        | 1.0        |
| Cr <sub>2</sub> FeS <sub>4</sub>  | 227 | 603366 | 0.59            | 1.37            | 14.7       | 105 | 1.85           | 11.60          | 1.0        | 4.0        |
| Cr <sub>2</sub> FeS <sub>4</sub>  | 227 | 625944 | 0.33            | 0.51            | 13.9       | 100 | 5.10           | 12.15          | 1.0        | 2.0        |
| Cr <sub>2</sub> FeS <sub>4</sub>  | 227 | 625936 | 0.33            | 0.51            | 13.8       | 100 | 5.13           | 12.17          | 1.0        | 2.0        |
| Cr <sub>2</sub> HgS <sub>4</sub>  | 227 | 626165 | 0.98            | 76.32           | 9.4        | 75  | 2.44           | 0.02           | 1.5        | 4.5        |
| Cr <sub>2</sub> HgS <sub>4</sub>  | 227 | 626162 | 0.98            | 76.37           | 9.4        | 75  | 2.44           | 0.02           | 1.5        | 4.5        |
| Cr <sub>2</sub> HgS <sub>4</sub>  | 227 | 053129 | 0.98            | 76.16           | 9.4        | 75  | 2.44           | 0.02           | 1.5        | 4.5        |
| Cr <sub>2</sub> MnS <sub>4</sub>  | 12  | 626279 | 4.93            | 0.53            | 10.3       | 63  | 0.77           | 1.70           | 3.5        | 1.0        |
| Cr <sub>2</sub> NiS <sub>4</sub>  | 12  | 016884 | 0.47            | 0.24            | 12.6       | 76  | 0.41           | 1.25           | 0.5        | 0.5        |
| Cr <sub>2</sub> S <sub>3</sub>    | 148 | 626604 | 1.65            | 0.37            | 9.3        | 63  | 0.79           | 0.72           | 1.5        | 0.5        |
| Cr <sub>2</sub> S <sub>3</sub>    | 148 | 016721 | 3.45            | 1.37            | 8.9        | 61  | 1.20           | 1.10           | 3.0        | 1.5        |
| Cr <sub>2</sub> S <sub>4</sub> Zn | 74  | 164167 | 0.70            | 47.87           | 12.4       | 83  | 3.24           | 0.07           | 1.5        | 6.0        |
| Cr <sub>2</sub> S <sub>4</sub> Zn | 227 | 626674 | 0.70            | 47.60           | 12.4       | 83  | 3.25           | 0.07           | 1.5        | 6.0        |
| Cr <sub>2</sub> S <sub>4</sub> Zn | 141 | 164168 | 0.71            | 11.24           | 12.3       | 83  | 3.22           | 0.06           | 1.5        | 2.0        |
| Cr <sub>2</sub> S <sub>4</sub> Zn | 227 | 164169 | 2.24            | 0.52            | 15.9       | 103 | 4.38           | 9.85           | 4.0        | 2.0        |
| Cr <sub>2</sub> S <sub>4</sub> Zn | 227 | 166481 | 2.27            | 0.52            | 16.1       | 104 | 4.23           | 9.90           | 4.0        | 2.0        |
| Cr <sub>2</sub> S <sub>4</sub> Zn | 227 | 042019 | 0.70            | 47.56           | 12.4       | 83  | 3.24           | 0.07           | 1.5        | 6.0        |
| Cr <sub>2</sub> S <sub>4</sub> Zn | 227 | 626675 | 2.25            | 0.53            | 15.2       | 100 | 4.44           | 9.89           | 4.0        | 2.0        |
| Cr <sub>2</sub> S <sub>4</sub> Zn | 227 | 601922 | 1.66            | 2.41            | 15.8       | 103 | 18.63          | 33.06          | 6.0        | 10.0       |
| Cr <sub>2</sub> S <sub>4</sub> Zn | 227 | 085198 | 2.19            | 0.51            | 16.8       | 107 | 4.42           | 9.90           | 4.0        | 2.0        |
| Cr <sub>2</sub> S <sub>4</sub> Zn | 227 | 626671 | 1.66            | 2.41            | 15.8       | 103 | 18.64          | 33.05          | 6.0        | 10.0       |
| Cr <sub>2</sub> S <sub>4</sub> Zn | 227 | 626672 | 2.26            | 0.52            | 15.7       | 103 | 4.32           | 9.86           | 4.0        | 2.0        |
| Cr <sub>2</sub> S <sub>4</sub> Zn | 227 | 626670 | 1.66            | 2.43            | 15.7       | 102 | 18.69          | 32.67          | 6.0        | 10.0       |
| Cr <sub>2</sub> S <sub>4</sub> Zn | 227 | 053209 | 1.70            | 2.45            | 15.3       | 102 | 18.71          | 33.45          | 6.0        | 10.0       |

| Compound                           | SG  | ICSD   | $\beta_{SE}(p)$ | $\beta_{SE}(n)$ | $\kappa_L$ | $B$ | $m_{DOS,VB}^*$ | $m_{DOS,CB}^*$ | $N_{b,VB}$ | $N_{b,CB}$ |
|------------------------------------|-----|--------|-----------------|-----------------|------------|-----|----------------|----------------|------------|------------|
| Cr <sub>2</sub> S <sub>4</sub> Zn  | 227 | 626666 | 1.66            | 2.41            | 15.9       | 103 | 18.60          | 32.84          | 6.0        | 10.0       |
| Cr <sub>3</sub> RbS <sub>5</sub>   | 12  | 073143 | 1.56            | 2.29            | 5.4        | 47  | 4.39           | 3.53           | 2.5        | 3.0        |
| Cr <sub>3</sub> S <sub>4</sub>     | 12  | 081886 | 4.71            | 5.11            | 7.2        | 49  | 1.01           | 0.88           | 3.5        | 3.5        |
| Cr <sub>4</sub> CuFeS <sub>8</sub> | 216 | 053108 | 1.84            | 0.81            | 14.5       | 94  | 0.61           | 2.40           | 1.5        | 1.5        |
| Cr <sub>5</sub> KS <sub>8</sub>    | 12  | 002568 | 1.02            | 0.56            | 6.4        | 50  | 2.23           | 2.37           | 1.5        | 1.0        |
| Cr <sub>5</sub> RbS <sub>8</sub>   | 12  | 002567 | 0.57            | 0.54            | 6.5        | 51  | 2.36           | 2.51           | 1.0        | 1.0        |
| CuFeS <sub>2</sub>                 | 122 | 002518 | 8.52            | 2.56            | 11.1       | 70  | 1.17           | 5.67           | 6.0        | 5.0        |
| CuFeS <sub>2</sub>                 | 122 | 261882 | 8.73            | 2.57            | 11.0       | 70  | 1.12           | 5.63           | 6.0        | 5.0        |
| CuFeS <sub>2</sub>                 | 122 | 627340 | 8.51            | 2.55            | 11.0       | 70  | 1.17           | 5.70           | 6.0        | 5.0        |
| CuFeS <sub>2</sub>                 | 122 | 030289 | 8.78            | 2.57            | 11.1       | 70  | 1.11           | 5.63           | 6.0        | 5.0        |
| CuFeS <sub>2</sub>                 | 122 | 080095 | 8.77            | 2.57            | 11.1       | 70  | 1.11           | 5.63           | 6.0        | 5.0        |
| CuFeS <sub>2</sub>                 | 122 | 261883 | 8.67            | 2.54            | 11.0       | 70  | 1.14           | 5.76           | 6.0        | 5.0        |
| CuFeS <sub>2</sub>                 | 122 | 094554 | 8.50            | 2.56            | 11.0       | 70  | 1.18           | 5.67           | 6.0        | 5.0        |
| CuFeS <sub>2</sub>                 | 122 | 080094 | 8.67            | 2.54            | 11.0       | 70  | 1.14           | 5.76           | 6.0        | 5.0        |
| CuFeS <sub>2</sub>                 | 122 | 060166 | 8.58            | 2.55            | 11.1       | 70  | 1.16           | 5.72           | 6.0        | 5.0        |
| CuFeS <sub>2</sub>                 | 122 | 627337 | 8.53            | 2.56            | 11.1       | 70  | 1.17           | 5.69           | 6.0        | 5.0        |
| CuFe <sub>2</sub> S <sub>3</sub>   | 62  | 067531 | 0.60            | 0.68            | 6.3        | 58  | 2.74           | 5.74           | 1.0        | 1.5        |
| CuFe <sub>2</sub> S <sub>3</sub>   | 62  | 067530 | 6.47            | 1.23            | 6.3        | 58  | 2.23           | 4.18           | 5.0        | 2.0        |
| CuFe <sub>2</sub> S <sub>3</sub>   | 62  | 014255 | 6.53            | 1.24            | 6.3        | 58  | 2.19           | 4.10           | 5.0        | 2.0        |
| CuFe <sub>2</sub> S <sub>3</sub>   | 62  | 161169 | 0.60            | 0.68            | 6.3        | 58  | 2.72           | 5.73           | 1.0        | 1.5        |
| CuFe <sub>2</sub> S <sub>3</sub>   | 62  | 067529 | 0.60            | 0.68            | 6.3        | 58  | 2.71           | 5.70           | 1.0        | 1.5        |
| CuFe <sub>2</sub> S <sub>3</sub>   | 62  | 653995 | 3.20            | 1.25            | 6.3        | 58  | 2.19           | 4.08           | 3.0        | 2.0        |
| CuFe <sub>2</sub> S <sub>3</sub>   | 62  | 016909 | 0.60            | 0.68            | 6.3        | 58  | 2.70           | 5.62           | 1.0        | 1.5        |
| CuFe <sub>2</sub> S <sub>3</sub>   | 62  | 042104 | 6.51            | 1.25            | 6.3        | 58  | 2.20           | 4.07           | 5.0        | 2.0        |
| CuFe <sub>2</sub> S <sub>3</sub>   | 62  | 029095 | 6.52            | 1.25            | 6.3        | 58  | 2.20           | 4.08           | 5.0        | 2.0        |
| CuFe <sub>2</sub> S <sub>3</sub>   | 62  | 159383 | 6.53            | 1.25            | 6.3        | 58  | 2.19           | 4.08           | 5.0        | 2.0        |
| CuGaS <sub>2</sub>                 | 122 | 028736 | 0.89            | 5.29            | 11.0       | 71  | 0.78           | 0.04           | 1.0        | 1.0        |
| CuGaS <sub>2</sub>                 | 122 | 627486 | 0.88            | 5.29            | 11.0       | 71  | 0.80           | 0.04           | 1.0        | 1.0        |
| CuGaS <sub>2</sub>                 | 122 | 066864 | 0.88            | 5.35            | 11.0       | 71  | 0.80           | 0.04           | 1.0        | 1.0        |
| CuGaS <sub>2</sub>                 | 122 | 600510 | 0.89            | 5.37            | 11.0       | 71  | 0.79           | 0.04           | 1.0        | 1.0        |
| CuGaS <sub>2</sub>                 | 122 | 627483 | 0.89            | 5.29            | 11.0       | 71  | 0.78           | 0.04           | 1.0        | 1.0        |

| Compound                            | SG  | ICSD   | $\beta_{SE}(p)$ | $\beta_{SE}(n)$ | $\kappa_L$ | $B$ | $m_{DOS,VB}^*$ | $m_{DOS,CB}^*$ | $N_{b,VB}$ | $N_{b,CB}$ |
|-------------------------------------|-----|--------|-----------------|-----------------|------------|-----|----------------|----------------|------------|------------|
| CuGaS <sub>2</sub>                  | 122 | 042126 | 0.89            | 5.36            | 11.0       | 71  | 0.79           | 0.04           | 1.0        | 1.0        |
| CuGaS <sub>2</sub>                  | 122 | 156786 | 0.87            | 5.25            | 11.0       | 71  | 0.82           | 0.04           | 1.0        | 1.0        |
| CuGaS <sub>2</sub>                  | 122 | 657346 | 0.88            | 5.31            | 11.0       | 71  | 0.80           | 0.04           | 1.0        | 1.0        |
| CuGaS <sub>2</sub>                  | 122 | 600238 | 0.89            | 5.29            | 11.0       | 71  | 0.78           | 0.04           | 1.0        | 1.0        |
| CuGaS <sub>2</sub>                  | 122 | 600604 | 0.88            | 5.27            | 11.0       | 71  | 0.81           | 0.04           | 1.0        | 1.0        |
| CuGaS <sub>2</sub>                  | 122 | 627481 | 0.89            | 5.27            | 11.0       | 71  | 0.78           | 0.04           | 1.0        | 1.0        |
| CuGaS <sub>2</sub>                  | 122 | 627475 | 0.88            | 5.29            | 11.0       | 71  | 0.80           | 0.04           | 1.0        | 1.0        |
| CuGaS <sub>2</sub>                  | 122 | 627484 | 0.88            | 5.23            | 11.0       | 71  | 0.80           | 0.04           | 1.0        | 1.0        |
| CuGaS <sub>2</sub>                  | 122 | 180351 | 0.88            | 5.21            | 11.0       | 71  | 0.80           | 0.04           | 1.0        | 1.0        |
| CuGaS <sub>2</sub>                  | 122 | 627478 | 0.88            | 5.29            | 11.0       | 71  | 0.80           | 0.04           | 1.0        | 1.0        |
| CuGeLa <sub>3</sub> S <sub>7</sub>  | 173 | 627711 | 2.78            | 2.21            | 6.0        | 57  | 2.94           | 1.68           | 3.0        | 2.0        |
| CuGeLa <sub>3</sub> S <sub>7</sub>  | 173 | 095025 | 2.77            | 2.24            | 6.0        | 57  | 2.95           | 1.64           | 3.0        | 2.0        |
| CuGeS <sub>7</sub> Y <sub>3</sub>   | 173 | 154626 | 3.06            | 2.94            | 6.0        | 56  | 2.42           | 1.00           | 3.0        | 2.0        |
| CuHfKS <sub>3</sub>                 | 63  | 409293 | 1.21            | 1.31            | 3.4        | 34  | 0.97           | 0.85           | 1.0        | 1.0        |
| CuInS <sub>2</sub>                  | 122 | 656271 | 2.62            | 7.40            | 9.1        | 62  | 1.87           | 0.03           | 3.0        | 1.0        |
| CuInS <sub>2</sub>                  | 122 | 028739 | 2.54            | 7.52            | 9.1        | 62  | 1.96           | 0.02           | 3.0        | 1.0        |
| CuInS <sub>2</sub>                  | 122 | 600239 | 2.70            | 7.32            | 9.1        | 62  | 1.78           | 0.03           | 3.0        | 1.0        |
| CuInS <sub>2</sub>                  | 122 | 628059 | 2.67            | 7.33            | 9.1        | 62  | 1.81           | 0.03           | 3.0        | 1.0        |
| CuInS <sub>2</sub>                  | 122 | 628063 | 2.66            | 7.51            | 9.1        | 62  | 1.82           | 0.02           | 3.0        | 1.0        |
| CuInS <sub>2</sub>                  | 122 | 628051 | 2.70            | 7.52            | 9.1        | 62  | 1.78           | 0.02           | 3.0        | 1.0        |
| CuInS <sub>2</sub>                  | 122 | 066865 | 2.64            | 7.28            | 9.1        | 62  | 1.84           | 0.03           | 3.0        | 1.0        |
| CuInS <sub>2</sub>                  | 122 | 042127 | 2.59            | 7.42            | 9.1        | 62  | 1.89           | 0.03           | 3.0        | 1.0        |
| CuKS                                | 33  | 049008 | 3.29            | 1.81            | 1.9        | 17  | 9.67           | 0.40           | 6.0        | 1.0        |
| CuKS <sub>3</sub> Zr                | 63  | 080624 | 1.10            | 2.17            | 3.8        | 33  | 0.92           | 1.49           | 1.0        | 2.0        |
| CuKS <sub>4</sub> Y <sub>2</sub>    | 63  | 097557 | 0.95            | 3.45            | 6.3        | 50  | 1.00           | 0.59           | 1.0        | 2.0        |
| CuK <sub>2</sub> NbS <sub>4</sub>   | 70  | 402422 | 12.96           | 1.37            | 1.5        | 16  | 6.37           | 4.11           | 12.0       | 2.0        |
| CuLa <sub>2</sub> S <sub>4</sub>    | 14  | 412900 | 0.71            | 1.61            | 5.3        | 56  | 2.63           | 8.67           | 1.0        | 3.0        |
| CuLa <sub>3</sub> S <sub>7</sub> Si | 173 | 628244 | 2.16            | 1.60            | 6.5        | 59  | 4.23           | 2.73           | 3.0        | 2.0        |
| CuLa <sub>3</sub> S <sub>7</sub> Sn | 173 | 628248 | 3.17            | 1.97            | 4.7        | 48  | 2.70           | 2.31           | 3.0        | 2.0        |
| CuNa <sub>3</sub> Ti                | 62  | 073886 | 2.41            | 2.67            | 4.4        | 42  | 1.48           | 3.23           | 2.0        | 3.0        |
| CuNa <sub>3</sub> Zr                | 63  | 073887 | 1.03            | 3.05            | 4.8        | 40  | 0.97           | 0.80           | 1.0        | 2.0        |

| Compound                                                        | SG  | ICSD   | $\beta_{SE}(p)$ | $\beta_{SE}(n)$ | $\kappa_L$ | $B$ | $m_{DOS,VB}^*$ | $m_{DOS,CB}^*$ | $N_{b,VB}$ | $N_{b,CB}$ |
|-----------------------------------------------------------------|-----|--------|-----------------|-----------------|------------|-----|----------------|----------------|------------|------------|
| CuNbRb <sub>2</sub> S <sub>4</sub>                              | 70  | 084304 | 14.89           | 2.64            | 1.3        | 14  | 7.10           | 4.14           | 13.0       | 3.0        |
| CuRb <sub>2</sub> S <sub>4</sub> V                              | 70  | 084302 | 8.32            | 3.35            | 1.5        | 16  | 5.68           | 5.12           | 8.0        | 4.0        |
| CuS <sub>2</sub> Sc                                             | 156 | 015298 | 2.66            | 1.68            | 15.7       | 75  | 1.97           | 2.17           | 4.0        | 3.0        |
| CuS <sub>2</sub> Y                                              | 62  | 092458 | 2.43            | 5.06            | 8.4        | 65  | 1.02           | 1.51           | 2.0        | 4.0        |
| CuS <sub>2</sub> Y                                              | 19  | 152553 | 2.84            | 5.82            | 5.1        | 46  | 1.00           | 1.53           | 2.0        | 4.0        |
| CuS <sub>2</sub> Y                                              | 19  | 628960 | 2.81            | 5.89            | 5.0        | 45  | 1.03           | 1.52           | 2.0        | 4.0        |
| CuS <sub>2</sub> Y                                              | 19  | 628966 | 2.84            | 5.94            | 4.8        | 44  | 1.03           | 1.52           | 2.0        | 4.0        |
| CuS <sub>7</sub> SiY <sub>3</sub>                               | 173 | 152792 | 2.44            | 2.65            | 7.5        | 65  | 3.09           | 1.04           | 3.0        | 2.0        |
| CuS <sub>7</sub> SiY <sub>3</sub>                               | 173 | 628864 | 2.42            | 2.63            | 7.6        | 65  | 3.13           | 1.05           | 3.0        | 2.0        |
| CuS <sub>7</sub> SnY <sub>3</sub>                               | 173 | 152554 | 3.23            | 2.74            | 5.8        | 55  | 2.26           | 1.15           | 3.0        | 2.0        |
| CuS <sub>7</sub> SnY <sub>3</sub>                               | 173 | 628890 | 3.24            | 2.73            | 5.8        | 55  | 2.26           | 1.16           | 3.0        | 2.0        |
| Cu <sub>2</sub> FeGeS <sub>4</sub>                              | 121 | 627306 | 1.55            | 0.36            | 10.6       | 68  | 0.81           | 0.72           | 1.5        | 0.5        |
| Cu <sub>2</sub> FeS <sub>4</sub> Sn                             | 81  | 181166 | 1.43            | 3.59            | 9.5        | 63  | 0.98           | 0.08           | 1.5        | 1.0        |
| Cu <sub>2</sub> FeS <sub>4</sub> Sn                             | 121 | 627358 | 1.50            | 9.19            | 9.2        | 62  | 0.92           | 0.04           | 1.5        | 1.5        |
| Cu <sub>2</sub> GeHgS <sub>4</sub>                              | 121 | 094988 | 3.18            | 7.65            | 8.6        | 64  | 1.55           | 0.03           | 3.0        | 1.0        |
| Cu <sub>2</sub> GeHgS <sub>4</sub>                              | 121 | 627691 | 3.09            | 7.72            | 8.6        | 63  | 1.62           | 0.03           | 3.0        | 1.0        |
| Cu <sub>2</sub> GeHgS <sub>4</sub>                              | 31  | 152762 | 2.57            | 9.84            | 6.7        | 62  | 1.23           | 0.03           | 2.0        | 1.0        |
| Cu <sub>2</sub> GeMnS <sub>4</sub>                              | 31  | 042490 | 2.25            | 3.31            | 8.1        | 64  | 1.20           | 0.13           | 2.0        | 1.0        |
| Cu <sub>2</sub> GeMnS <sub>4</sub>                              | 31  | 415453 | 3.05            | 2.41            | 7.4        | 62  | 3.98           | 3.01           | 4.0        | 3.0        |
| Cu <sub>2</sub> GeS <sub>3</sub>                                | 9   | 085138 | 0.78            | 5.23            | 8.9        | 67  | 1.27           | 0.05           | 1.0        | 1.0        |
| Cu <sub>2</sub> GeS <sub>4</sub> Sr                             | 145 | 010005 | 2.65            | 12.63           | 5.7        | 54  | 1.22           | 0.23           | 2.0        | 3.0        |
| Cu <sub>2</sub> GeS <sub>4</sub> Zn                             | 121 | 627794 | 1.86            | 4.92            | 10.7       | 69  | 1.18           | 0.05           | 2.0        | 1.0        |
| Cu <sub>2</sub> GeS <sub>4</sub> Zn                             | 121 | 627804 | 1.84            | 5.01            | 10.8       | 70  | 1.19           | 0.04           | 2.0        | 1.0        |
| Cu <sub>2</sub> GeS <sub>4</sub> Zn                             | 121 | 152752 | 1.83            | 4.91            | 10.7       | 70  | 1.21           | 0.05           | 2.0        | 1.0        |
| Cu <sub>2</sub> GeS <sub>4</sub> Zn                             | 121 | 061693 | 1.85            | 4.97            | 10.7       | 69  | 1.19           | 0.05           | 2.0        | 1.0        |
| Cu <sub>2</sub> HgS <sub>4</sub> Sn                             | 121 | 627930 | 3.01            | 9.60            | 7.8        | 59  | 1.76           | 0.02           | 3.0        | 1.0        |
| Cu <sub>2</sub> HgS <sub>4</sub> Sn                             | 121 | 627929 | 3.02            | 9.56            | 7.8        | 59  | 1.75           | 0.02           | 3.0        | 1.0        |
| Cu <sub>2</sub> In <sub>2</sub> S <sub>6</sub> Si               | 9   | 157375 | 2.39            | 6.38            | 3.6        | 38  | 1.73           | 0.07           | 2.0        | 1.0        |
| Cu <sub>2</sub> KS <sub>4</sub> V                               | 40  | 402424 | 6.74            | 1.48            | 1.7        | 18  | 2.64           | 9.98           | 5.0        | 3.0        |
| Cu <sub>2</sub> KS <sub>4</sub> V                               | 40  | 402924 | 6.81            | 1.48            | 1.7        | 18  | 2.59           | 10.03          | 5.0        | 3.0        |
| Cu <sub>2</sub> La <sub>6</sub> S <sub>14</sub> Si <sub>2</sub> | 173 | 023519 | 2.18            | 1.60            | 6.5        | 59  | 4.17           | 2.72           | 3.0        | 2.0        |

| Compound                                                       | SG  | ICSD   | $\beta_{SE}(p)$ | $\beta_{SE}(n)$ | $\kappa_L$ | $B$ | $m_{DOS,VB}^*$ | $m_{DOS,CB}^*$ | $N_{b,VB}$ | $N_{b,CB}$ |
|----------------------------------------------------------------|-----|--------|-----------------|-----------------|------------|-----|----------------|----------------|------------|------------|
| Cu <sub>2</sub> MnS <sub>4</sub> Si                            | 31  | 415452 | 0.69            | 0.39            | 8.9        | 67  | 1.54           | 4.08           | 1.0        | 1.0        |
| Cu <sub>2</sub> MnS <sub>4</sub> Sn                            | 121 | 628379 | 1.62            | 3.27            | 9.2        | 61  | 0.79           | 0.10           | 1.5        | 1.0        |
| Cu <sub>2</sub> NaNbS <sub>4</sub>                             | 40  | 084301 | 4.88            | 5.08            | 0.1        | 2   | 4.87           | 2.71           | 5.0        | 4.0        |
| Cu <sub>2</sub> Na <sub>2</sub> S <sub>4</sub> Zr              | 12  | 079536 | 0.82            | 1.43            | 6.2        | 47  | 1.17           | 0.46           | 1.0        | 1.0        |
| Cu <sub>2</sub> PbS <sub>4</sub> Si                            | 154 | 152763 | 1.75            | 4.73            | 4.4        | 48  | 0.62           | 3.01           | 1.0        | 4.0        |
| Cu <sub>2</sub> Pt <sub>4</sub> S <sub>8</sub>                 | 13  | 074894 | 9.63            | 6.06            | 5.3        | 67  | 0.61           | 0.10           | 3.0        | 1.0        |
| Cu <sub>2</sub> RbS <sub>4</sub> V                             | 40  | 280516 | 10.27           | 1.58            | 1.6        | 18  | 3.10           | 9.68           | 7.0        | 3.0        |
| Cu <sub>2</sub> Rb <sub>2</sub> S <sub>4</sub> Ti              | 132 | 280644 | 4.07            | 1.20            | 2.8        | 28  | 5.78           | 1.04           | 5.0        | 1.0        |
| Cu <sub>2</sub> Rb <sub>2</sub> S <sub>6</sub> Sn <sub>2</sub> | 15  | 074021 | 4.16            | 5.52            | 3.0        | 37  | 4.45           | 0.11           | 4.0        | 1.0        |
| Cu <sub>2</sub> S                                              | 194 | 020560 | 12.35           | 8.24            | 2.4        | 27  | 1.61           | 0.24           | 6.0        | 2.0        |
| Cu <sub>2</sub> S                                              | 96  | 016550 | 2.61            | 7.25            | 9.5        | 82  | 5.39           | 0.04           | 4.0        | 1.0        |
| Cu <sub>2</sub> S                                              | 194 | 166578 | 9.51            | 3.11            | 2.5        | 27  | 1.62           | 0.24           | 5.0        | 1.0        |
| Cu <sub>2</sub> S <sub>3</sub> Si                              | 36  | 070057 | 2.20            | 2.65            | 10.1       | 71  | 1.02           | 1.92           | 2.0        | 3.0        |
| Cu <sub>2</sub> S <sub>3</sub> Si                              | 143 | 024132 | 3.07            | 4.28            | 7.5        | 57  | 3.38           | 0.08           | 4.0        | 1.0        |
| Cu <sub>2</sub> S <sub>3</sub> Si                              | 9   | 088235 | 0.44            | 3.35            | 9.8        | 69  | 3.02           | 0.10           | 1.0        | 1.0        |
| Cu <sub>2</sub> S <sub>3</sub> Sn                              | 9   | 091762 | 3.63            | 7.81            | 7.5        | 59  | 1.41           | 0.03           | 3.0        | 1.0        |
| Cu <sub>2</sub> S <sub>4</sub> SiZn                            | 31  | 261367 | 0.88            | 4.90            | 9.4        | 71  | 1.07           | 0.06           | 1.0        | 1.0        |
| Cu <sub>2</sub> S <sub>4</sub> SnSr                            | 154 | 043131 | 2.53            | 7.01            | 5.1        | 50  | 1.39           | 0.05           | 2.0        | 1.0        |
| Cu <sub>2</sub> S <sub>4</sub> SnZn                            | 82  | 262388 | 3.49            | 5.85            | 9.5        | 64  | 1.14           | 0.04           | 3.0        | 1.0        |
| Cu <sub>2</sub> S <sub>4</sub> SnZn                            | 121 | 184478 | 1.82            | 6.08            | 9.6        | 65  | 1.30           | 0.03           | 2.0        | 1.0        |
| Cu <sub>3</sub> KS <sub>2</sub>                                | 12  | 100001 | 0.81            | 5.75            | 4.2        | 40  | 1.76           | 0.07           | 1.0        | 1.0        |
| Cu <sub>3</sub> NbS <sub>4</sub>                               | 215 | 108392 | 9.90            | 2.58            | 3.9        | 33  | 2.03           | 2.65           | 7.0        | 3.0        |
| Cu <sub>3</sub> NbS <sub>4</sub>                               | 215 | 170784 | 18.43           | 2.59            | 3.9        | 32  | 2.07           | 2.62           | 11.0       | 3.0        |
| Cu <sub>3</sub> NbS <sub>4</sub>                               | 215 | 183994 | 10.11           | 2.59            | 3.9        | 32  | 1.97           | 2.64           | 7.0        | 3.0        |
| Cu <sub>3</sub> NbS <sub>4</sub>                               | 215 | 628466 | 9.93            | 2.59            | 3.9        | 32  | 2.03           | 2.64           | 7.0        | 3.0        |
| Cu <sub>3</sub> NbS <sub>4</sub>                               | 215 | 628472 | 9.95            | 2.59            | 3.9        | 33  | 2.01           | 2.62           | 7.0        | 3.0        |
| Cu <sub>3</sub> RbS <sub>2</sub>                               | 12  | 409646 | 1.87            | 5.96            | 4.2        | 41  | 2.31           | 0.07           | 2.0        | 1.0        |
| Cu <sub>3</sub> S <sub>4</sub> V                               | 215 | 628947 | 10.03           | 0.94            | 4.6        | 36  | 1.83           | 5.09           | 7.0        | 2.0        |
| Cu <sub>3</sub> S <sub>4</sub> V                               | 215 | 001414 | 10.09           | 0.93            | 4.5        | 36  | 1.83           | 5.25           | 7.0        | 2.0        |
| Cu <sub>3</sub> S <sub>4</sub> V                               | 215 | 015490 | 10.27           | 0.95            | 4.4        | 35  | 1.80           | 5.09           | 7.0        | 2.0        |
| Cu <sub>3</sub> S <sub>4</sub> V                               | 215 | 628945 | 10.21           | 0.93            | 4.6        | 36  | 1.78           | 5.24           | 7.0        | 2.0        |

| Compound                                       | SG  | ICSD   | $\beta_{SE}(p)$ | $\beta_{SE}(n)$ | $\kappa_L$ | $B$ | $m_{DOS,VB}^*$ | $m_{DOS,CB}^*$ | $N_{b,VB}$ | $N_{b,CB}$ |
|------------------------------------------------|-----|--------|-----------------|-----------------|------------|-----|----------------|----------------|------------|------------|
| Cu <sub>3</sub> S <sub>4</sub> V               | 215 | 628955 | 10.06           | 0.94            | 4.6        | 36  | 1.82           | 5.12           | 7.0        | 2.0        |
| Cu <sub>3</sub> S <sub>4</sub> V               | 215 | 036169 | 10.21           | 0.93            | 4.6        | 36  | 1.78           | 5.23           | 7.0        | 2.0        |
| Cu <sub>3</sub> S <sub>4</sub> V               | 215 | 183993 | 10.25           | 0.93            | 4.5        | 36  | 1.78           | 5.21           | 7.0        | 2.0        |
| Cu <sub>3</sub> S <sub>4</sub> V               | 215 | 628957 | 10.09           | 0.94            | 4.6        | 36  | 1.81           | 5.11           | 7.0        | 2.0        |
| Cu <sub>3</sub> S <sub>4</sub> V               | 215 | 036298 | 10.04           | 0.94            | 4.6        | 36  | 1.84           | 5.09           | 7.0        | 2.0        |
| Cu <sub>3</sub> S <sub>4</sub> V               | 215 | 402891 | 10.22           | 0.92            | 4.6        | 36  | 1.78           | 5.25           | 7.0        | 2.0        |
| Cu <sub>4</sub> Na <sub>2</sub> S <sub>3</sub> | 12  | 100829 | 1.73            | 5.69            | 4.5        | 46  | 0.56           | 0.08           | 1.0        | 1.0        |
| Cu <sub>4</sub> S <sub>4</sub> Sn              | 62  | 604567 | 4.21            | 12.46           | 4.9        | 57  | 0.81           | 0.03           | 2.0        | 1.0        |
| Cu <sub>4</sub> S <sub>4</sub> Sn              | 62  | 628881 | 4.24            | 12.58           | 4.8        | 57  | 0.80           | 0.03           | 2.0        | 1.0        |
| Cu <sub>4</sub> S <sub>4</sub> Sn              | 62  | 000833 | 4.22            | 12.30           | 4.9        | 57  | 0.81           | 0.03           | 2.0        | 1.0        |
| Cu <sub>4</sub> S <sub>4</sub> Ti              | 121 | 082558 | 7.68            | 1.12            | 8.6        | 63  | 4.50           | 3.33           | 9.0        | 2.0        |
| Cu <sub>6</sub> GeS <sub>8</sub> W             | 186 | 156238 | 6.48            | 4.73            | 4.6        | 53  | 3.19           | 0.13           | 5.0        | 1.0        |
| Cu <sub>8</sub> GeS <sub>6</sub>               | 31  | 089452 | 2.09            | 9.92            | 2.1        | 30  | 0.74           | 0.05           | 1.0        | 1.0        |
| Cu <sub>8</sub> GeS <sub>6</sub>               | 31  | 280133 | 2.09            | 9.91            | 2.1        | 31  | 0.73           | 0.05           | 1.0        | 1.0        |
| Cu <sub>8</sub> S <sub>6</sub> Si              | 31  | 024374 | 1.27            | 8.41            | 5.9        | 66  | 1.10           | 0.05           | 1.0        | 1.0        |
| Cu <sub>8</sub> S <sub>6</sub> Si              | 31  | 628854 | 1.33            | 8.70            | 4.9        | 57  | 1.11           | 0.05           | 1.0        | 1.0        |
| FeGa <sub>2</sub> S <sub>4</sub>               | 164 | 602041 | 2.53            | 5.81            | 0.3        | 3   | 11.26          | 0.11           | 4.0        | 1.0        |
| FeGa <sub>2</sub> S <sub>4</sub>               | 164 | 100706 | 1.73            | 3.48            | 0.2        | 3   | 3.97           | 0.05           | 2.0        | 0.5        |
| FeKS <sub>2</sub>                              | 15  | 068383 | 3.21            | 0.30            | 1.9        | 16  | 1.85           | 7.48           | 3.0        | 1.0        |
| FeLa <sub>3</sub> MnS <sub>7</sub>             | 173 | 035581 | 1.54            | 1.07            | 5.0        | 50  | 8.39           | 5.98           | 3.0        | 2.0        |
| FeMo <sub>2</sub> S <sub>4</sub>               | 9   | 002019 | 1.08            | 0.18            | 5.8        | 63  | 3.44           | 5.47           | 1.5        | 0.5        |
| FeMo <sub>3</sub> S <sub>4</sub>               | 2   | 014069 | 3.99            | 0.79            | 4.4        | 47  | 3.76           | 2.21           | 4.0        | 1.0        |
| FeNa <sub>6</sub> S <sub>4</sub>               | 186 | 072303 | 0.79            | 2.71            | 3.7        | 31  | 7.39           | 0.19           | 2.0        | 1.0        |
| FeRbS <sub>2</sub>                             | 15  | 633208 | 3.66            | 0.32            | 1.6        | 15  | 1.75           | 7.98           | 3.0        | 1.0        |
| FeS                                            | 186 | 053528 | 1.01            | 7.64            | 15.3       | 80  | 2.28           | 2.62           | 2.0        | 9.0        |
| FeS                                            | 62  | 035008 | 3.00            | 1.54            | 12.8       | 82  | 1.34           | 1.59           | 3.0        | 2.0        |
| FeS                                            | 62  | 087499 | 6.90            | 1.93            | 12.8       | 82  | 0.66           | 2.82           | 4.0        | 3.0        |
| FeS                                            | 194 | 053526 | 1.01            | 7.57            | 15.3       | 80  | 2.27           | 2.66           | 2.0        | 9.0        |
| FeS                                            | 62  | 633259 | 3.21            | 1.91            | 12.8       | 82  | 0.47           | 2.85           | 2.0        | 3.0        |
| FeS <sub>2</sub>                               | 205 | 043716 | 2.32            | 2.82            | 9.2        | 66  | 0.19           | 1.80           | 1.0        | 3.0        |
| FeS <sub>2</sub>                               | 1   | 010422 | 2.29            | 1.69            | 9.2        | 66  | 0.20           | 1.63           | 1.0        | 2.0        |

| Compound                                       | SG  | ICSD   | $\beta_{SE}(p)$ | $\beta_{SE}(n)$ | $\kappa_L$ | $B$ | $m_{DOS,VB}^*$ | $m_{DOS,CB}^*$ | $N_{b,VB}$ | $N_{b,CB}$ |
|------------------------------------------------|-----|--------|-----------------|-----------------|------------|-----|----------------|----------------|------------|------------|
| FeS <sub>2</sub>                               | 205 | 053529 | 2.21            | 2.15            | 9.2        | 66  | 0.21           | 1.10           | 1.0        | 2.0        |
| FeS <sub>2</sub>                               | 29  | 041401 | 1.89            | 2.95            | 9.2        | 66  | 0.27           | 1.67           | 1.0        | 3.0        |
| FeS <sub>2</sub>                               | 205 | 041995 | 2.33            | 1.50            | 9.2        | 66  | 0.19           | 1.02           | 1.0        | 1.5        |
| FeS <sub>2</sub>                               | 205 | 052372 | 2.27            | 1.32            | 9.2        | 66  | 0.20           | 1.27           | 1.0        | 1.5        |
| FeS <sub>2</sub>                               | 205 | 053935 | 0.92            | 0.95            | 9.2        | 66  | 0.18           | 0.85           | 0.5        | 1.0        |
| FeS <sub>2</sub>                               | 205 | 000316 | 1.91            | 4.31            | 9.2        | 66  | 0.26           | 1.74           | 1.0        | 4.0        |
| FeS <sub>2</sub>                               | 205 | 015012 | 2.29            | 1.39            | 9.2        | 66  | 0.20           | 1.16           | 1.0        | 1.5        |
| FeS <sub>2</sub>                               | 205 | 633270 | 0.68            | 0.12            | 9.6        | 68  | 0.29           | 5.24           | 0.5        | 0.5        |
| FeS <sub>2</sub>                               | 205 | 109377 | 0.68            | 0.13            | 9.6        | 68  | 0.29           | 4.71           | 0.5        | 0.5        |
| FeS <sub>2</sub>                               | 205 | 633287 | 1.88            | 2.96            | 9.2        | 66  | 0.27           | 1.66           | 1.0        | 3.0        |
| FeS <sub>2</sub>                               | 205 | 633254 | 0.68            | 0.12            | 9.6        | 68  | 0.29           | 4.95           | 0.5        | 0.5        |
| FeS <sub>2</sub>                               | 205 | 633289 | 1.91            | 2.88            | 9.2        | 66  | 0.26           | 1.74           | 1.0        | 3.0        |
| FeS <sub>4</sub> Sc <sub>2</sub>               | 227 | 100527 | 1.12            | 1.72            | 11.5       | 71  | 4.18           | 1.22           | 2.5        | 2.0        |
| Fe <sub>2</sub> Ga <sub>2</sub> S <sub>5</sub> | 166 | 032551 | 0.97            | 6.82            | 0.5        | 6   | 2.16           | 0.08           | 1.0        | 1.0        |
| Fe <sub>2</sub> GeS <sub>4</sub>               | 62  | 023526 | 9.69            | 1.77            | 9.6        | 87  | 4.45           | 2.26           | 9.0        | 2.0        |
| Fe <sub>2</sub> KS <sub>3</sub>                | 63  | 099507 | 5.17            | 0.43            | 1.3        | 13  | 3.83           | 5.55           | 5.0        | 1.0        |
| Fe <sub>2</sub> Na <sub>3</sub> S <sub>4</sub> | 62  | 100357 | 1.41            | 1.67            | 2.0        | 22  | 4.64           | 8.97           | 2.0        | 3.0        |
| Fe <sub>2</sub> RbS <sub>3</sub>               | 63  | 099505 | 6.72            | 0.46            | 1.1        | 12  | 4.36           | 5.82           | 6.0        | 1.0        |
| Fe <sub>2</sub> RbS <sub>3</sub>               | 63  | 099506 | 6.69            | 0.46            | 1.1        | 12  | 4.39           | 5.81           | 6.0        | 1.0        |
| Fe <sub>2</sub> Rb <sub>3</sub> S <sub>4</sub> | 62  | 079225 | 1.86            | 1.42            | 1.7        | 20  | 8.78           | 5.32           | 3.0        | 2.0        |
| Fe <sub>2</sub> S <sub>4</sub> Si              | 62  | 000332 | 0.58            | 0.42            | 7.0        | 61  | 0.54           | 0.91           | 0.5        | 0.5        |
| Fe <sub>2</sub> S <sub>4</sub> Si              | 62  | 088517 | 0.59            | 0.42            | 7.0        | 61  | 0.51           | 0.91           | 0.5        | 0.5        |
| GaMo <sub>4</sub> S <sub>8</sub>               | 216 | 041935 | 0.57            | 0.09            | 10.1       | 78  | 5.73           | 9.48           | 1.5        | 0.5        |
| GaMo <sub>4</sub> S <sub>8</sub>               | 216 | 158198 | 0.57            | 0.09            | 10.1       | 78  | 5.73           | 9.52           | 1.5        | 0.5        |
| GaMo <sub>4</sub> S <sub>8</sub>               | 160 | 033995 | 0.30            | 0.09            | 11.5       | 85  | 5.95           | 9.30           | 1.0        | 0.5        |
| GaMo <sub>4</sub> S <sub>8</sub>               | 216 | 049566 | 0.57            | 0.09            | 10.1       | 78  | 5.71           | 9.64           | 1.5        | 0.5        |
| GaMo <sub>4</sub> S <sub>8</sub>               | 216 | 033994 | 0.86            | 0.09            | 9.8        | 76  | 5.72           | 9.55           | 2.0        | 0.5        |
| GaMo <sub>4</sub> S <sub>8</sub>               | 216 | 634707 | 0.86            | 0.09            | 10.1       | 78  | 5.71           | 9.63           | 2.0        | 0.5        |
| GaMo <sub>4</sub> S <sub>8</sub>               | 160 | 158201 | 0.30            | 0.09            | 11.5       | 85  | 5.96           | 9.54           | 1.0        | 0.5        |
| GaMo <sub>4</sub> S <sub>8</sub>               | 160 | 106732 | 0.30            | 0.09            | 11.5       | 85  | 5.97           | 9.49           | 1.0        | 0.5        |
| GaMo <sub>4</sub> S <sub>8</sub> Si            | 216 | 053580 | 2.34            | 2.71            | 2.4        | 26  | 1.86           | 1.46           | 2.0        | 2.0        |



| Compound                                      | SG  | ICSD   | $\beta_{SE}(p)$ | $\beta_{SE}(n)$ | $\kappa_L$ | $B$ | $m_{DOS,VB}^*$ | $m_{DOS,CB}^*$ | $N_{b,VB}$ | $N_{b,CB}$ |
|-----------------------------------------------|-----|--------|-----------------|-----------------|------------|-----|----------------|----------------|------------|------------|
| GaNb <sub>4</sub> S <sub>8</sub>              | 216 | 170657 | 3.46            | 1.77            | 9.5        | 70  | 2.63           | 2.68           | 4.0        | 2.5        |
| Ga <sub>2</sub> MnS <sub>4</sub>              | 82  | 152909 | 1.08            | 1.41            | 5.6        | 38  | 1.64           | 0.40           | 1.5        | 1.0        |
| Ga <sub>2</sub> NiS <sub>4</sub>              | 164 | 059230 | 1.41            | 29.80           | 0.4        | 5   | 5.77           | 0.38           | 2.0        | 5.5        |
| GePtS                                         | 29  | 637646 | 34.19           | 8.04            | 15.1       | 129 | 0.49           | 0.16           | 9.0        | 2.0        |
| IrS <sub>2</sub>                              | 62  | 080568 | 4.55            | 11.17           | 12.4       | 125 | 2.80           | 3.15           | 4.0        | 8.0        |
| IrS <sub>2</sub>                              | 62  | 640950 | 4.57            | 11.25           | 12.4       | 125 | 2.77           | 3.12           | 4.0        | 8.0        |
| KMo <sub>3</sub> S <sub>3</sub>               | 176 | 030752 | 3.02            | 1.32            | 1.8        | 21  | 1.43           | 1.13           | 2.0        | 1.0        |
| KMo <sub>3</sub> S <sub>3</sub>               | 176 | 603631 | 3.02            | 1.32            | 1.8        | 21  | 1.43           | 1.13           | 2.0        | 1.0        |
| KMo <sub>3</sub> S <sub>3</sub>               | 176 | 641249 | 3.02            | 1.32            | 1.8        | 21  | 1.43           | 1.14           | 2.0        | 1.0        |
| KNbS <sub>2</sub>                             | 194 | 026286 | 1.50            | 4.64            | 12.1       | 72  | 0.29           | 2.88           | 1.0        | 6.0        |
| K <sub>2</sub> MnS <sub>2</sub>               | 72  | 065453 | 3.55            | 2.54            | 3.5        | 25  | 8.79           | 0.16           | 7.0        | 1.0        |
| K <sub>2</sub> MoS <sub>4</sub>               | 62  | 409563 | 3.59            | 1.36            | 1.1        | 12  | 2.61           | 1.01           | 3.0        | 1.0        |
| K <sub>2</sub> MoS <sub>4</sub>               | 62  | 641254 | 3.69            | 1.34            | 1.1        | 12  | 2.49           | 1.03           | 3.0        | 1.0        |
| K <sub>2</sub> Ni <sub>3</sub> S <sub>4</sub> | 70  | 081731 | 13.62           | 1.51            | 1.7        | 19  | 4.50           | 4.13           | 10.0       | 2.0        |
| K <sub>2</sub> Ni <sub>3</sub> S <sub>4</sub> | 70  | 641275 | 13.62           | 1.52            | 1.7        | 19  | 4.50           | 4.08           | 10.0       | 2.0        |
| K <sub>2</sub> PdS <sub>2</sub>               | 71  | 641296 | 4.43            | 3.03            | 4.8        | 31  | 7.18           | 2.69           | 8.0        | 4.0        |
| K <sub>2</sub> Pd <sub>3</sub> S <sub>4</sub> | 70  | 041885 | 8.29            | 1.77            | 1.8        | 21  | 6.80           | 3.50           | 8.0        | 2.0        |
| K <sub>2</sub> PtS <sub>2</sub>               | 71  | 026258 | 3.52            | 3.79            | 4.3        | 33  | 6.77           | 2.32           | 6.0        | 4.0        |
| K <sub>2</sub> Pt <sub>4</sub> S <sub>6</sub> | 166 | 040062 | 1.31            | 8.10            | 2.3        | 27  | 5.97           | 0.74           | 2.0        | 3.0        |
| K <sub>3</sub> NbS <sub>4</sub>               | 62  | 073326 | 0.74            | 0.72            | 1.4        | 15  | 2.56           | 2.67           | 1.0        | 1.0        |
| K <sub>3</sub> S <sub>4</sub> V               | 62  | 081413 | 0.74            | 1.58            | 1.6        | 17  | 2.33           | 3.34           | 1.0        | 2.0        |
| K <sub>3</sub> S <sub>4</sub> V               | 62  | 641342 | 0.73            | 1.58            | 1.6        | 17  | 2.41           | 3.36           | 1.0        | 2.0        |
| K <sub>3</sub> S <sub>4</sub> V               | 62  | 074678 | 0.74            | 1.58            | 1.6        | 17  | 2.33           | 3.35           | 1.0        | 2.0        |
| K <sub>6</sub> MnS <sub>4</sub>               | 186 | 065448 | 2.63            | 2.73            | 2.6        | 22  | 8.91           | 0.20           | 5.0        | 1.0        |
| LaMo <sub>6</sub> S <sub>8</sub>              | 148 | 641457 | 1.42            | 6.00            | 8.4        | 73  | 1.53           | 0.27           | 1.5        | 2.0        |
| MnNa <sub>6</sub> S <sub>4</sub>              | 186 | 642996 | 1.22            | 4.04            | 3.6        | 30  | 9.14           | 0.10           | 3.0        | 1.0        |
| MnNa <sub>6</sub> S <sub>4</sub>              | 186 | 095067 | 1.21            | 3.97            | 3.6        | 30  | 9.26           | 0.10           | 3.0        | 1.0        |
| MnNa <sub>6</sub> S <sub>4</sub>              | 186 | 095065 | 1.22            | 4.03            | 3.6        | 30  | 9.15           | 0.10           | 3.0        | 1.0        |
| MnNa <sub>6</sub> S <sub>4</sub>              | 186 | 065447 | 1.22            | 4.02            | 3.6        | 30  | 9.12           | 0.10           | 3.0        | 1.0        |
| MnNa <sub>6</sub> S <sub>4</sub>              | 186 | 095066 | 1.22            | 3.99            | 3.6        | 30  | 9.15           | 0.10           | 3.0        | 1.0        |
| MnNb <sub>3</sub> S <sub>6</sub>              | 182 | 643019 | 3.76            | 2.06            | 11.0       | 92  | 1.43           | 1.52           | 3.0        | 2.0        |

| Compound                                       | SG  | ICSD   | $\beta_{SE}(p)$ | $\beta_{SE}(n)$ | $\kappa_L$ | $B$ | $m_{DOS,VB}^*$ | $m_{DOS,CB}^*$ | $N_{b,VB}$ | $N_{b,CB}$ |
|------------------------------------------------|-----|--------|-----------------|-----------------|------------|-----|----------------|----------------|------------|------------|
| MnRb <sub>2</sub> S <sub>2</sub>               | 72  | 065454 | 3.72            | 3.20            | 2.6        | 22  | 10.84          | 0.15           | 7.0        | 1.0        |
| MnS                                            | 225 | 643438 | 0.31            | 1.30            | 22.0       | 83  | 1.87           | 0.45           | 1.0        | 1.5        |
| MnS                                            | 225 | 076204 | 0.32            | 1.30            | 21.9       | 83  | 1.84           | 0.45           | 1.0        | 1.5        |
| MnS                                            | 225 | 643445 | 0.30            | 1.28            | 22.0       | 83  | 1.96           | 0.46           | 1.0        | 1.5        |
| MnS                                            | 225 | 041331 | 0.30            | 1.28            | 22.0       | 83  | 1.96           | 0.46           | 1.0        | 1.5        |
| MnS                                            | 186 | 643455 | 0.81            | 1.82            | 11.9       | 56  | 2.77           | 6.09           | 2.0        | 5.0        |
| MnS                                            | 225 | 643436 | 0.31            | 1.31            | 21.9       | 83  | 1.89           | 0.44           | 1.0        | 1.5        |
| MnS                                            | 225 | 603118 | 0.30            | 1.29            | 22.0       | 83  | 1.99           | 0.46           | 1.0        | 1.5        |
| MnS                                            | 225 | 643444 | 0.30            | 1.29            | 22.0       | 83  | 2.00           | 0.46           | 1.0        | 1.5        |
| MnS                                            | 225 | 158648 | 0.31            | 1.28            | 22.0       | 83  | 1.94           | 0.46           | 1.0        | 1.5        |
| MnS                                            | 216 | 643454 | 0.75            | 0.66            | 15.8       | 58  | 1.06           | 2.60           | 1.5        | 2.0        |
| MnS                                            | 225 | 158647 | 0.31            | 1.30            | 21.9       | 83  | 1.89           | 0.44           | 1.0        | 1.5        |
| MnS                                            | 225 | 643451 | 0.30            | 1.28            | 22.0       | 83  | 1.99           | 0.46           | 1.0        | 1.5        |
| MnS                                            | 216 | 076205 | 0.76            | 0.66            | 15.8       | 58  | 1.04           | 2.60           | 1.5        | 2.0        |
| MnS                                            | 225 | 643443 | 0.30            | 1.29            | 22.0       | 83  | 2.01           | 0.46           | 1.0        | 1.5        |
| MnS                                            | 225 | 643437 | 0.30            | 1.28            | 22.0       | 83  | 1.97           | 0.46           | 1.0        | 1.5        |
| MnS                                            | 225 | 158650 | 0.29            | 1.29            | 22.0       | 83  | 2.09           | 0.45           | 1.0        | 1.5        |
| MnS <sub>2</sub>                               | 58  | 643441 | 1.34            | 6.09            | 10.3       | 58  | 0.32           | 0.65           | 1.0        | 4.0        |
| MnS <sub>2</sub>                               | 205 | 015991 | 1.75            | 2.98            | 8.7        | 60  | 0.29           | 3.02           | 1.0        | 4.0        |
| MnS <sub>4</sub> Sc <sub>2</sub>               | 227 | 643459 | 2.04            | 1.21            | 11.4       | 69  | 2.32           | 0.43           | 3.0        | 1.0        |
| MnS <sub>4</sub> Sc <sub>2</sub>               | 227 | 100832 | 2.05            | 1.20            | 11.4       | 69  | 2.32           | 0.43           | 3.0        | 1.0        |
| MnS <sub>4</sub> Sc <sub>2</sub>               | 227 | 074406 | 2.04            | 1.21            | 11.4       | 69  | 2.33           | 0.43           | 3.0        | 1.0        |
| MnS <sub>4</sub> Sc <sub>2</sub>               | 227 | 037424 | 2.05            | 1.20            | 11.4       | 69  | 2.32           | 0.43           | 3.0        | 1.0        |
| MnS <sub>4</sub> Sc <sub>2</sub>               | 227 | 094992 | 2.05            | 1.20            | 11.4       | 69  | 2.32           | 0.43           | 3.0        | 1.0        |
| Mn <sub>2</sub> Na <sub>2</sub> S <sub>3</sub> | 15  | 036209 | 0.47            | 3.24            | 3.7        | 34  | 4.22           | 0.17           | 1.0        | 1.0        |
| Mn <sub>2</sub> S <sub>4</sub> Si              | 62  | 065710 | 0.62            | 0.83            | 9.2        | 81  | 12.18          | 7.54           | 2.0        | 2.0        |
| Mn <sub>2</sub> S <sub>4</sub> Si              | 62  | 024141 | 1.24            | 0.48            | 9.4        | 82  | 9.88           | 3.76           | 3.0        | 1.0        |
| Mn <sub>2</sub> S <sub>4</sub> Sn              | 65  | 023265 | 2.22            | 2.02            | 7.6        | 52  | 0.94           | 0.22           | 2.0        | 1.0        |
| Mn <sub>2</sub> S <sub>4</sub> Sn              | 65  | 078760 | 3.93            | 1.97            | 7.6        | 52  | 0.93           | 0.23           | 3.0        | 1.0        |
| Mn <sub>3</sub> Rb <sub>2</sub> S <sub>4</sub> | 72  | 643392 | 2.14            | 2.39            | 2.4        | 24  | 4.99           | 1.62           | 3.0        | 2.0        |
| MoRb <sub>2</sub> S <sub>4</sub>               | 62  | 280054 | 3.38            | 1.36            | 0.9        | 11  | 3.41           | 1.20           | 3.0        | 1.0        |

| Compound                          | SG  | ICSD   | $\beta_{SE}(p)$ | $\beta_{SE}(n)$ | $\kappa_L$ | $B$ | $m_{DOS,VB}^*$ | $m_{DOS,CB}^*$ | $N_{b,VB}$ | $N_{b,CB}$ |
|-----------------------------------|-----|--------|-----------------|-----------------|------------|-----|----------------|----------------|------------|------------|
| MoRb <sub>2</sub> S <sub>4</sub>  | 62  | 644177 | 3.40            | 1.36            | 0.9        | 11  | 3.38           | 1.20           | 3.0        | 1.0        |
| Mo <sub>2</sub> S <sub>3</sub>    | 11  | 076371 | 7.27            | 3.19            | 4.2        | 39  | 2.89           | 2.26           | 6.0        | 3.0        |
| Mo <sub>2</sub> S <sub>3</sub>    | 11  | 062486 | 7.28            | 3.16            | 4.2        | 39  | 2.89           | 2.31           | 6.0        | 3.0        |
| Mo <sub>2</sub> S <sub>3</sub>    | 11  | 073453 | 7.29            | 3.21            | 4.2        | 39  | 2.88           | 2.24           | 6.0        | 3.0        |
| Mo <sub>2</sub> S <sub>3</sub>    | 11  | 602115 | 7.27            | 3.17            | 4.2        | 39  | 2.90           | 2.29           | 6.0        | 3.0        |
| Mo <sub>2</sub> S <sub>3</sub>    | 11  | 644252 | 7.26            | 3.20            | 4.2        | 39  | 2.90           | 2.25           | 6.0        | 3.0        |
| Mo <sub>2</sub> S <sub>4</sub> V  | 9   | 644314 | 1.54            | 0.53            | 6.7        | 69  | 8.97           | 4.08           | 3.0        | 1.0        |
| Mo <sub>2</sub> S <sub>4</sub> V  | 12  | 201787 | 0.32            | 1.08            | 7.7        | 56  | 5.37           | 0.69           | 1.0        | 1.0        |
| Mo <sub>3</sub> RbS <sub>3</sub>  | 176 | 603622 | 3.12            | 1.31            | 1.6        | 20  | 1.43           | 1.21           | 2.0        | 1.0        |
| Mo <sub>3</sub> RbS <sub>3</sub>  | 176 | 644175 | 3.13            | 1.32            | 1.7        | 20  | 1.42           | 1.19           | 2.0        | 1.0        |
| Mo <sub>3</sub> RbS <sub>3</sub>  | 176 | 030753 | 3.12            | 1.31            | 1.7        | 20  | 1.42           | 1.20           | 2.0        | 1.0        |
| Mo <sub>6</sub> S <sub>8</sub> Sr | 148 | 644293 | 1.82            | 1.84            | 6.4        | 59  | 2.16           | 5.45           | 2.0        | 3.0        |
| Mo <sub>6</sub> S <sub>8</sub> Sr | 148 | 062156 | 1.86            | 1.78            | 6.4        | 59  | 2.09           | 5.75           | 2.0        | 3.0        |
| Mo <sub>6</sub> S <sub>8</sub> Sr | 2   | 065941 | 2.28            | 0.33            | 6.1        | 56  | 0.30           | 7.62           | 1.0        | 1.0        |
| Mo <sub>6</sub> S <sub>8</sub> Sr | 148 | 644292 | 2.28            | 0.33            | 6.1        | 56  | 0.30           | 7.61           | 1.0        | 1.0        |
| Mo <sub>6</sub> S <sub>8</sub> Sr | 148 | 644296 | 1.84            | 1.82            | 6.4        | 59  | 2.12           | 5.54           | 2.0        | 3.0        |
| Mo <sub>6</sub> S <sub>8</sub> Sr | 148 | 065940 | 1.83            | 1.82            | 6.4        | 59  | 2.14           | 5.58           | 2.0        | 3.0        |
| Mo <sub>6</sub> S <sub>8</sub> Y  | 148 | 644317 | 3.07            | 1.07            | 9.0        | 76  | 1.34           | 0.18           | 2.5        | 0.5        |
| NaNbS <sub>2</sub>                | 194 | 026285 | 1.06            | 1.23            | 11.9       | 73  | 0.55           | 2.18           | 1.0        | 2.0        |
| NaS <sub>2</sub> V                | 166 | 076541 | 0.31            | 0.38            | 11.0       | 54  | 7.45           | 5.44           | 1.5        | 1.5        |
| NaS <sub>2</sub> V                | 160 | 644994 | 0.46            | 0.20            | 11.4       | 55  | 7.60           | 1.18           | 2.0        | 0.5        |
| NaS <sub>2</sub> V                | 164 | 644993 | 0.67            | 0.15            | 11.2       | 55  | 6.87           | 2.01           | 2.5        | 0.5        |
| Na <sub>2</sub> PdS <sub>2</sub>  | 36  | 076533 | 4.33            | 5.14            | 4.6        | 37  | 2.06           | 1.55           | 4.0        | 4.0        |
| Na <sub>2</sub> PtS <sub>2</sub>  | 36  | 087219 | 9.05            | 6.80            | 4.0        | 38  | 2.92           | 1.27           | 7.0        | 4.0        |
| NbRb <sub>3</sub> S <sub>4</sub>  | 62  | 051114 | 1.63            | 0.86            | 1.1        | 14  | 4.33           | 2.50           | 2.0        | 1.0        |
| NbRb <sub>3</sub> S <sub>4</sub>  | 62  | 059382 | 1.63            | 0.86            | 1.1        | 14  | 4.32           | 2.50           | 2.0        | 1.0        |
| NbS <sub>3</sub>                  | 2   | 645323 | 5.85            | 2.81            | 0.2        | 2   | 2.63           | 1.77           | 4.0        | 2.0        |
| NbS <sub>3</sub>                  | 2   | 002380 | 4.40            | 2.87            | 0.2        | 3   | 7.72           | 1.86           | 5.0        | 2.0        |
| Nb <sub>3</sub> S <sub>6</sub> Ti | 182 | 645331 | 5.18            | 2.17            | 10.1       | 83  | 0.06           | 0.68           | 1.0        | 1.5        |
| NiS                               | 186 | 042493 | 1.83            | 10.66           | 17.8       | 97  | 0.91           | 3.17           | 2.0        | 12.0       |
| NiS                               | 194 | 042492 | 1.83            | 10.67           | 17.8       | 97  | 0.91           | 3.16           | 2.0        | 12.0       |

| Compound                                       | SG  | ICSD   | $\beta_{SE}(p)$ | $\beta_{SE}(n)$ | $\kappa_L$ | $B$ | $m_{DOS,VB}^*$ | $m_{DOS,CB}^*$ | $N_{b,VB}$ | $N_{b,CB}$ |
|------------------------------------------------|-----|--------|-----------------|-----------------|------------|-----|----------------|----------------|------------|------------|
| NiS <sub>8</sub> V <sub>4</sub>                | 12  | 035141 | 2.70            | 0.12            | 20.3       | 116 | 1.32           | 3.66           | 3.0        | 0.5        |
| PdS                                            | 84  | 061063 | 4.59            | 2.79            | 12.9       | 107 | 3.35           | 0.18           | 5.0        | 1.0        |
| PdS                                            | 84  | 648749 | 4.56            | 2.75            | 12.9       | 107 | 3.39           | 0.18           | 5.0        | 1.0        |
| PdS                                            | 84  | 026766 | 4.56            | 2.77            | 12.9       | 107 | 3.39           | 0.18           | 5.0        | 1.0        |
| Pd <sub>3</sub> Rb <sub>2</sub> S <sub>4</sub> | 12  | 041886 | 7.82            | 2.05            | 1.5        | 17  | 4.90           | 2.45           | 7.0        | 2.0        |
| Pd <sub>3</sub> Rb <sub>2</sub> S <sub>4</sub> | 70  | 648723 | 12.88           | 1.87            | 1.3        | 17  | 6.48           | 3.78           | 10.0       | 2.0        |
| PtRb <sub>2</sub> S <sub>2</sub>               | 71  | 026259 | 4.09            | 3.81            | 3.8        | 31  | 3.91           | 2.61           | 5.0        | 4.0        |
| PtS                                            | 131 | 031131 | 5.28            | 0.92            | 18.9       | 118 | 2.52           | 0.72           | 6.0        | 1.0        |
| PtS                                            | 131 | 649541 | 5.29            | 0.91            | 18.9       | 118 | 2.52           | 0.72           | 6.0        | 1.0        |
| PtS                                            | 131 | 649537 | 5.29            | 0.91            | 19.0       | 118 | 2.51           | 0.72           | 6.0        | 1.0        |
| PtS                                            | 131 | 654379 | 5.29            | 0.92            | 18.9       | 118 | 2.52           | 0.71           | 6.0        | 1.0        |
| Pt <sub>3</sub> Rb <sub>2</sub> S <sub>4</sub> | 69  | 026267 | 23.44           | 2.62            | 1.2        | 16  | 1.07           | 2.21           | 7.0        | 2.0        |
| RbS <sub>8</sub> V <sub>5</sub>                | 12  | 602319 | 0.57            | 0.74            | 5.8        | 47  | 2.42           | 7.78           | 1.0        | 2.0        |
| Rb <sub>2</sub> S <sub>4</sub> W               | 62  | 281586 | 3.59            | 1.51            | 0.8        | 11  | 3.63           | 1.18           | 3.0        | 1.0        |
| Rb <sub>2</sub> S <sub>4</sub> W               | 62  | 650041 | 5.57            | 1.44            | 0.8        | 11  | 3.41           | 1.28           | 4.0        | 1.0        |
| Rb <sub>3</sub> S <sub>4</sub> V               | 62  | 409565 | 1.41            | 1.91            | 1.3        | 15  | 5.24           | 3.14           | 2.0        | 2.0        |
| Rh <sub>2</sub> S <sub>3</sub>                 | 60  | 015344 | 1.58            | 2.95            | 17.6       | 140 | 0.43           | 1.98           | 1.0        | 3.0        |
| RuS <sub>2</sub>                               | 205 | 657507 | 6.96            | 2.41            | 24.0       | 155 | 8.49           | 0.15           | 12.0       | 1.0        |
| RuS <sub>2</sub>                               | 205 | 041996 | 6.94            | 2.37            | 24.0       | 155 | 8.54           | 0.16           | 12.0       | 1.0        |
| RuS <sub>2</sub>                               | 205 | 024186 | 7.00            | 2.36            | 24.0       | 155 | 8.42           | 0.16           | 12.0       | 1.0        |
| RuS <sub>2</sub>                               | 205 | 650579 | 6.95            | 2.35            | 24.0       | 155 | 8.52           | 0.16           | 12.0       | 1.0        |
| RuS <sub>2</sub>                               | 205 | 604472 | 7.04            | 2.35            | 24.0       | 155 | 8.34           | 0.16           | 12.0       | 1.0        |
| RuS <sub>2</sub>                               | 205 | 068472 | 6.95            | 2.37            | 24.0       | 155 | 8.52           | 0.16           | 12.0       | 1.0        |
| RuS <sub>2</sub>                               | 205 | 650581 | 6.96            | 2.41            | 24.0       | 155 | 8.49           | 0.15           | 12.0       | 1.0        |
| RuS <sub>2</sub>                               | 205 | 650577 | 6.92            | 2.37            | 24.0       | 155 | 8.58           | 0.15           | 12.0       | 1.0        |
| RuS <sub>2</sub>                               | 205 | 600680 | 6.96            | 2.41            | 24.0       | 155 | 8.49           | 0.15           | 12.0       | 1.0        |
| RuS <sub>2</sub>                               | 205 | 056019 | 7.03            | 2.41            | 24.0       | 155 | 8.36           | 0.15           | 12.0       | 1.0        |
| RuS <sub>2</sub>                               | 205 | 052374 | 7.01            | 2.40            | 24.0       | 155 | 8.40           | 0.15           | 12.0       | 1.0        |
| SV                                             | 62  | 651366 | 5.58            | 0.95            | 14.2       | 85  | 2.14           | 0.62           | 6.0        | 1.0        |
| SV                                             | 194 | 083867 | 0.92            | 1.50            | 18.6       | 87  | 5.72           | 0.99           | 3.0        | 2.0        |
| SV                                             | 194 | 033613 | 0.92            | 1.50            | 18.6       | 87  | 5.72           | 0.99           | 3.0        | 2.0        |

| Compound                      | SG  | ICSD   | $\beta_{SE}(p)$ | $\beta_{SE}(n)$ | $\kappa_L$ | $B$ | $m_{DOS,VB}^*$ | $m_{DOS,CB}^*$ | $N_{b,VB}$ | $N_{b,CB}$ |
|-------------------------------|-----|--------|-----------------|-----------------|------------|-----|----------------|----------------|------------|------------|
| SV                            | 194 | 601915 | 0.92            | 1.50            | 18.6       | 87  | 5.72           | 0.99           | 3.0        | 2.0        |
| SV                            | 62  | 052212 | 5.62            | 0.96            | 14.2       | 85  | 2.11           | 0.61           | 6.0        | 1.0        |
| SV                            | 62  | 651373 | 5.59            | 0.95            | 14.2       | 85  | 2.14           | 0.63           | 6.0        | 1.0        |
| SV                            | 62  | 024564 | 5.63            | 0.96            | 14.2       | 85  | 2.11           | 0.61           | 6.0        | 1.0        |
| SV                            | 62  | 041778 | 3.16            | 0.95            | 14.2       | 85  | 2.15           | 0.62           | 4.0        | 1.0        |
| SV                            | 194 | 651358 | 0.92            | 1.50            | 18.6       | 87  | 5.72           | 0.99           | 3.0        | 2.0        |
| SV                            | 62  | 602567 | 5.57            | 0.95            | 14.2       | 85  | 2.15           | 0.62           | 6.0        | 1.0        |
| SV                            | 194 | 052211 | 0.92            | 1.50            | 18.6       | 87  | 5.72           | 0.99           | 3.0        | 2.0        |
| SV <sub>3</sub>               | 121 | 026515 | 0.30            | 0.87            | 8.7        | 75  | 7.99           | 6.82           | 1.0        | 2.0        |
| SV <sub>3</sub>               | 121 | 651364 | 0.79            | 0.87            | 8.7        | 75  | 7.96           | 6.80           | 2.0        | 2.0        |
| S <sub>4</sub> V <sub>3</sub> | 176 | 072921 | 0.95            | 1.14            | 6.8        | 51  | 4.68           | 3.47           | 2.0        | 2.0        |
| S <sub>4</sub> V <sub>5</sub> | 87  | 024563 | 0.63            | 0.17            | 7.5        | 54  | 1.66           | 2.97           | 1.0        | 0.5        |
| S <sub>4</sub> V <sub>5</sub> | 87  | 041777 | 0.64            | 0.17            | 7.5        | 54  | 1.65           | 2.98           | 1.0        | 0.5        |
| S <sub>8</sub> V <sub>5</sub> | 12  | 651379 | 2.48            | 1.13            | 7.7        | 57  | 1.54           | 0.13           | 2.5        | 0.5        |
| S <sub>8</sub> V <sub>5</sub> | 12  | 073002 | 1.94            | 0.93            | 7.7        | 57  | 2.33           | 0.19           | 2.5        | 0.5        |
